# Supplementary material
Source: publisher site journal article supplement (https://www.spandidos-publications.com/7488/downloadSupplementary)
Supplement: Supplementary file 1 [file downloadSupplementary]

## Sheet: Table SI
Table SI. qPCR primer sequences for genes co-enriched with lipid metabolism in the AGE-RAGE signaling pathway.
Oligo Name	Sequence (5' to 3')
m-Thbd-F	gac tgt gac cct aac tct cct act g
m-Thbd-R	cct cct ctt cct tgg tgt ctt cc
m-Prkcb-F	atc gct gct gta tgg act tat tca c
m-Prkcb-R	aac act tga tgg tct tgg tct tctg
m-Tgfb2-F	cga gca gcg gat tga act gta tc
m-Tgfb2-R	gag ggc aac aac att agc agg ag
m-Edn1-F	gct gtt cct gtt ctt cct tga tgg
m-Edn1-R	atg cct tga tgc tat tgc tga tgg
m-Pik3cd-F	gtc cac tcc tcc tcc atc ctt g
m-Pik3cd-R	gcg tgc ctt ctt agc ctt ctc
m-Col3a1-F	gaa cca ggt gct aaa gga gaa aga g
m-Col3a1-R	tta ttg cca gga gga cca gga ag
m-Agt-F	tgg cac cct ggt ctc ttt cta c
m-Agt-R	gca agt tca tct tcc acc ctg tc
m-Ccl2-F	cac tca cct gct gct act cat tc
m-Ccl2-R	act gtc aca ctg gtc act cct ac
m-Col4a2-F	aac gac aag tcc tac tgg ctc tc
m-Col4a2-R	gat ggt gtg ctc tgg aag ttc tg
m-Plcb1-F	gaa gtc ata gaa gcc atc gca gag
m-Plcb1-R	cat cgt cgt cgt cat cgt cat c
m-Serpine1-F	cgc ctc ctc atc ctg cct aag
m-Serpine1-R	tgc cga acc aca aag aga aag g
m-Col1a1-F	cct cct ggt tct cct ggt tct c
m-Col1a1-R	ggc tgc gga tgt tct caa tct g
Sagon Biotech (Shanghai)

## Sheet: Table SII
Table SII. Analysis of GO functional enrichment of DEGs.
ONTOLOGY	ID	Description	GeneRatio	BgRatio	P-value	p.adjust	qvalue	geneID	Count	zscore
BP	GO:0009150	purine ribonucleotide metabolic process	11/45	363/18112	9.94185e-10	6.88492e-07	5.12642e-07	Hmgcs2/Acot1/Hk2/Acot2/Sult1a1/Nppa/Eno3/Acsl6/Aldoc/Pdk4/Nupr1	11	1.50756
BP	GO:0009259	ribonucleotide metabolic process	11/45	382/18112	1.69867e-09	6.88492e-07	5.12642e-07	Hmgcs2/Acot1/Hk2/Acot2/Sult1a1/Nppa/Eno3/Acsl6/Aldoc/Pdk4/Nupr1	11	1.50756
BP	GO:0006163	purine nucleotide metabolic process	11/45	388/18112	1.99981e-09	6.88492e-07	5.12642e-07	Hmgcs2/Acot1/Hk2/Acot2/Sult1a1/Nppa/Eno3/Acsl6/Aldoc/Pdk4/Nupr1	11	1.50756
BP	GO:0019693	ribose phosphate metabolic process	11/45	392/18112	2.22633e-09	6.88492e-07	5.12642e-07	Hmgcs2/Acot1/Hk2/Acot2/Sult1a1/Nppa/Eno3/Acsl6/Aldoc/Pdk4/Nupr1	11	1.50756
BP	GO:0072521	purine-containing compound metabolic process	11/45	415/18112	4.03584e-09	9.98466e-07	7.43444e-07	Hmgcs2/Acot1/Hk2/Acot2/Sult1a1/Nppa/Eno3/Acsl6/Aldoc/Pdk4/Nupr1	11	1.50756
BP	GO:0009117	nucleotide metabolic process	11/45	462/18112	1.22648e-08	2.52859e-06	1.88275e-06	Hmgcs2/Acot1/Hk2/Acot2/Sult1a1/Nppa/Eno3/Acsl6/Aldoc/Pdk4/Nupr1	11	1.50756
BP	GO:0006753	nucleoside phosphate metabolic process	11/45	470/18112	1.46378e-08	2.58671e-06	1.92603e-06	Hmgcs2/Acot1/Hk2/Acot2/Sult1a1/Nppa/Eno3/Acsl6/Aldoc/Pdk4/Nupr1	11	1.50756
BP	GO:0033865	nucleoside bisphosphate metabolic process	6/45	110/18112	2.93813e-07	3.63447e-05	2.70617e-05	Hmgcs2/Acot1/Acot2/Sult1a1/Acsl6/Pdk4	6	1.63299
BP	GO:0033875	ribonucleoside bisphosphate metabolic process	6/45	110/18112	2.93813e-07	3.63447e-05	2.70617e-05	Hmgcs2/Acot1/Acot2/Sult1a1/Acsl6/Pdk4	6	1.63299
BP	GO:0034032	purine nucleoside bisphosphate metabolic process	6/45	110/18112	2.93813e-07	3.63447e-05	2.70617e-05	Hmgcs2/Acot1/Acot2/Sult1a1/Acsl6/Pdk4	6	1.63299
BP	GO:0006090	pyruvate metabolic process	6/45	123/18112	5.69071e-07	6.39946e-05	4.76495e-05	Hk2/Pc/Eno3/Aldoc/Pdk4/Nupr1	6	0
BP	GO:0006790	sulfur compound metabolic process	8/45	319/18112	1.03708e-06	0.000103433	7.70145e-05	Hmgcs2/Acot1/Acot2/Sult1a1/Mgst1/Acsl6/Pdk4/Gstt2	8	2.12132
BP	GO:0001666	response to hypoxia	9/45	439/18112	1.087e-06	0.000103433	7.70145e-05	Hk2/Slc2a4/Acot2/Penk/Nppa/Slc2a1/Acsl6/Aldoc/Ucp3	9	0.333333
BP	GO:0036293	response to decreased oxygen levels	9/45	473/18112	2.01176e-06	0.000163772	0.000121942	Hk2/Slc2a4/Acot2/Penk/Nppa/Slc2a1/Acsl6/Aldoc/Ucp3	9	0.333333
BP	GO:0042594	response to starvation	7/45	242/18112	2.05238e-06	0.000163772	0.000121942	Hmgcs2/Bdh1/Slc2a1/Pdp2/Pdk4/Klf10/Gcgr	7	-0.377964
BP	GO:0032868	response to insulin	8/45	351/18112	2.11831e-06	0.000163772	0.000121942	Hmgcs2/Slc2a4/Bdh1/Nppa/Slc2a1/Acsl6/Pdk4/Ucp3	8	0
BP	GO:0006637	acyl-CoA metabolic process	5/45	89/18112	2.67609e-06	0.000183907	0.000136934	Hmgcs2/Acot1/Acot2/Acsl6/Pdk4	5	1.34164
BP	GO:0035383	thioester metabolic process	5/45	89/18112	2.67609e-06	0.000183907	0.000136934	Hmgcs2/Acot1/Acot2/Acsl6/Pdk4	5	1.34164
BP	GO:0006631	fatty acid metabolic process	8/45	426/18112	8.81441e-06	0.000573864	0.000427291	Decr1/Acot1/Acot2/Alox15/Acsl6/Pdk4/Ucp3/Cyp2e1	8	2.12132
BP	GO:0001676	long-chain fatty acid metabolic process	5/45	119/18112	1.11422e-05	0.000689144	0.000513127	Acot1/Acot2/Alox15/Acsl6/Cyp2e1	5	1.34164
BP	GO:0007584	response to nutrient	7/45	317/18112	1.20741e-05	0.000711224	0.000529567	Hmgcs2/Penk/Bdh1/Acsl6/Ucp3/Klk1/Cyp26b1	7	0.377964
BP	GO:1901570	fatty acid derivative biosynthetic process	3/45	24/18112	2.79673e-05	0.00157252	0.00117088	Hmgcs2/Alox15/Acsl6	3	0.57735
BP	GO:0046323	glucose import	4/45	93/18112	8.26083e-05	0.00426989	0.0031793	Hk2/Slc2a4/Slc2a1/Gpc3	4	-1
BP	GO:0006096	glycolytic process	4/45	94/18112	8.61239e-05	0.00426989	0.0031793	Hk2/Eno3/Aldoc/Nupr1	4	0
BP	GO:0000038	very long-chain fatty acid metabolic process	3/45	35/18112	8.87254e-05	0.00426989	0.0031793	Acot1/Acot2/Acsl6	3	0.57735
BP	GO:0006757	ATP generation from ADP	4/45	95/18112	8.97472e-05	0.00426989	0.0031793	Hk2/Eno3/Aldoc/Nupr1	4	0
BP	GO:0009636	response to toxic substance	6/45	304/18112	9.99294e-05	0.00457824	0.0034089	Penk/Sult1a1/Bdh1/Mgst1/Gstt2/Nupr1	6	1.63299
BP	GO:0046031	ADP metabolic process	4/45	104/18112	0.000127534	0.00563427	0.00419519	Hk2/Eno3/Aldoc/Nupr1	4	0
BP	GO:0009135	purine nucleoside diphosphate metabolic process	4/45	111/18112	0.000164023	0.00676323	0.00503581	Hk2/Eno3/Aldoc/Nupr1	4	0
BP	GO:0009179	purine ribonucleoside diphosphate metabolic process	4/45	111/18112	0.000164023	0.00676323	0.00503581	Hk2/Eno3/Aldoc/Nupr1	4	0
BP	GO:0006165	nucleoside diphosphate phosphorylation	4/45	114/18112	0.000181765	0.00725301	0.00540049	Hk2/Eno3/Aldoc/Nupr1	4	0
BP	GO:0046939	nucleotide phosphorylation	4/45	117/18112	0.000200853	0.00776423	0.00578114	Hk2/Eno3/Aldoc/Nupr1	4	0
BP	GO:0044282	small molecule catabolic process	6/45	348/18112	0.000208583	0.00781872	0.00582171	Decr1/Hk2/Acot2/Sult1a1/Bcat2/Cyp26b1	6	0.816497
BP	GO:0009185	ribonucleoside diphosphate metabolic process	4/45	120/18112	0.000221348	0.00805315	0.00599626	Hk2/Eno3/Aldoc/Nupr1	4	0
BP	GO:0008654	phospholipid biosynthetic process	5/45	226/18112	0.000235442	0.0083212	0.00619585	Hmgcs2/Pik3c2g/Pc/Alox15/Acsl6	5	0.447214
BP	GO:0060416	response to growth hormone	3/45	49/18112	0.000243763	0.00837078	0.00623276	Hmgcs2/Bdh1/Igfbp5	3	-0.57735
BP	GO:0050727	regulation of inflammatory response	6/45	360/18112	0.000250379	0.00837078	0.00623276	Nppa/Alox15/Wfdc1/Klk1/Nupr1/C2cd4b	6	0.816497
BP	GO:1901568	fatty acid derivative metabolic process	3/45	50/18112	0.000258872	0.00842697	0.0062746	Hmgcs2/Alox15/Acsl6	3	0.57735
BP	GO:1904659	glucose transmembrane transport	4/45	130/18112	0.000300595	0.00911562	0.00678736	Hk2/Slc2a4/Slc2a1/Gpc3	4	-1
BP	GO:0006644	phospholipid metabolic process	6/45	373/18112	0.000302842	0.00911562	0.00678736	Hmgcs2/Pik3c2g/Pc/Alox15/Acsl6/Pla2g2a	6	0.816497
BP	GO:0008645	hexose transmembrane transport	4/45	131/18112	0.000309504	0.00911562	0.00678736	Hk2/Slc2a4/Slc2a1/Gpc3	4	-1
BP	GO:0030282	bone mineralization	4/45	131/18112	0.000309504	0.00911562	0.00678736	Gpc3/Alox15/Klf10/Col1a2	4	1
BP	GO:0015749	monosaccharide transmembrane transport	4/45	136/18112	0.000356911	0.0102674	0.00764498	Hk2/Slc2a4/Slc2a1/Gpc3	4	-1
BP	GO:0009132	nucleoside diphosphate metabolic process	4/45	138/18112	0.000377255	0.010606	0.00789709	Hk2/Eno3/Aldoc/Nupr1	4	0
BP	GO:0015911	long-chain fatty acid import across plasma membrane	2/45	13/18112	0.000462689	0.0122729	0.00913821	Slc2a1/Acsl6	2	-1.41421
BP	GO:0030324	lung development	5/45	264/18112	0.000480638	0.0122729	0.00913821	Hmgcs2/Gpc3/Rbbp9/Igfbp5/Col3a1	5	-0.447214
BP	GO:0034219	carbohydrate transmembrane transport	4/45	148/18112	0.000491615	0.0122729	0.00913821	Hk2/Slc2a4/Slc2a1/Gpc3	4	-1
BP	GO:0045471	response to ethanol	5/45	266/18112	0.000497434	0.0122729	0.00913821	Hmgcs2/Slc2a4/Penk/Bdh1/Cyp2e1	5	0.447214
BP	GO:0050729	positive regulation of inflammatory response	4/45	149/18112	0.000504266	0.0122729	0.00913821	Nppa/Klk1/Nupr1/C2cd4b	4	1
BP	GO:0030323	respiratory tube development	5/45	267/18112	0.000505996	0.0122729	0.00913821	Hmgcs2/Gpc3/Rbbp9/Igfbp5/Col3a1	5	-0.447214
BP	GO:0031669	cellular response to nutrient levels	5/45	267/18112	0.000505996	0.0122729	0.00913821	Penk/Slc2a1/Pdk4/Klf10/Gcgr	5	0.447214
BP	GO:0051591	response to cAMP	4/45	150/18112	0.000517147	0.0123021	0.00916	Hmgcs2/Penk/Kcne1/Igfbp5	4	0
BP	GO:0016052	carbohydrate catabolic process	4/45	156/18112	0.000599411	0.01399	0.0104168	Hk2/Eno3/Aldoc/Nupr1	4	0
BP	GO:1903818	positive regulation of voltage-gated potassium channel activity	2/45	15/18112	0.000620884	0.0142228	0.0105901	Nppa/Kcne1	2	0
BP	GO:0071496	cellular response to external stimulus	6/45	433/18112	0.000666912	0.0149994	0.0111684	Penk/Nppa/Slc2a1/Pdk4/Klf10/Gcgr	6	0.816497
BP	GO:0015909	long-chain fatty acid transport	3/45	70/18112	0.000698354	0.0153685	0.0114432	Slc2a1/Acsl6/Pla2g2a	3	-0.57735
BP	GO:0001503	ossification	6/45	438/18112	0.000708168	0.0153685	0.0114432	Penk/Gpc3/Alox15/Klf10/Igfbp5/Col1a2	6	0.816497
BP	GO:0048857	neural nucleus development	3/45	71/18112	0.000727901	0.015508	0.011547	Ckb/Eno3/Kcne1	3	-1.73205
BP	GO:0008643	carbohydrate transport	4/45	165/18112	0.000739669	0.015508	0.011547	Hk2/Slc2a4/Slc2a1/Gpc3	4	-1
BP	GO:1902001	fatty acid transmembrane transport	2/45	17/18112	0.000801653	0.0163513	0.012175	Slc2a1/Acsl6	2	-1.41421
BP	GO:0031349	positive regulation of defense response	5/45	296/18112	0.000806331	0.0163513	0.012175	Penk/Nppa/Klk1/Nupr1/C2cd4b	5	1.34164
BP	GO:0060541	respiratory system development	5/45	298/18112	0.000831074	0.0165813	0.0123462	Hmgcs2/Gpc3/Rbbp9/Igfbp5/Col3a1	5	-0.447214
BP	GO:0006091	generation of precursor metabolites and energy	6/45	459/18112	0.000903568	0.0177415	0.0132101	Hmgcs2/Hk2/Eno3/Aldoc/Gcgr/Nupr1	6	0
BP	GO:0031668	cellular response to extracellular stimulus	5/45	305/18112	0.000922168	0.0177559	0.0132208	Penk/Slc2a1/Pdk4/Klf10/Gcgr	5	0.447214
BP	GO:0071320	cellular response to cAMP	3/45	78/18112	0.000957197	0.0177559	0.0132208	Penk/Kcne1/Igfbp5	3	-0.57735
BP	GO:0031214	biomineral tissue development	4/45	177/18112	0.000960913	0.0177559	0.0132208	Gpc3/Alox15/Klf10/Col1a2	4	1
BP	GO:1901653	cellular response to peptide	6/45	466/18112	0.000977201	0.0177559	0.0132208	Hmgcs2/Slc2a4/Acsl6/Pdk4/Klf10/Gcgr	6	0
BP	GO:0009267	cellular response to starvation	4/45	179/18112	0.00100185	0.0177559	0.0132208	Slc2a1/Pdk4/Klf10/Gcgr	4	0
BP	GO:0097623	potassium ion export across plasma membrane	2/45	19/18112	0.00100478	0.0177559	0.0132208	Nppa/Kcne1	2	0
BP	GO:1902259	regulation of delayed rectifier potassium channel activity	2/45	19/18112	0.00100478	0.0177559	0.0132208	Nppa/Kcne1	2	0
BP	GO:0110148	biomineralization	4/45	182/18112	0.00106555	0.0185645	0.0138229	Gpc3/Alox15/Klf10/Col1a2	4	1
BP	GO:0044539	long-chain fatty acid import into cell	2/45	20/18112	0.00111466	0.0191505	0.0142592	Slc2a1/Acsl6	2	-1.41421
BP	GO:0043588	skin development	5/45	320/18112	0.00114227	0.019356	0.0144122	Igfbp5/Col3a1/Cyp26b1/Col1a2/Tgm1	5	-0.447214
BP	GO:0140354	lipid import into cell	2/45	21/18112	0.00123005	0.0205618	0.01531	Slc2a1/Acsl6	2	-1.41421
BP	GO:0046683	response to organophosphorus	4/45	194/18112	0.00134896	0.0222489	0.0165662	Hmgcs2/Penk/Kcne1/Igfbp5	4	0
BP	GO:0006575	cellular modified amino acid metabolic process	4/45	198/18112	0.00145412	0.0236677	0.0176226	Ckb/Sult1a1/Mgst1/Gstt2	4	1
BP	GO:0042593	glucose homeostasis	5/45	343/18112	0.00155261	0.0249402	0.0185701	Hk2/Slc2a4/Pdk4/Igfbp5/Gcgr	5	-1.34164
BP	GO:0033500	carbohydrate homeostasis	5/45	344/18112	0.00157262	0.0249402	0.0185701	Hk2/Slc2a4/Pdk4/Igfbp5/Gcgr	5	-1.34164
BP	GO:0006721	terpenoid metabolic process	3/45	94/18112	0.00164051	0.0256874	0.0191265	Hmgcs2/Cyp2e1/Cyp26b1	3	1.73205
BP	GO:0044342	type B pancreatic cell proliferation	2/45	25/18112	0.00174615	0.0269998	0.0201037	Igfbp5/Nupr1	2	0
BP	GO:0099623	regulation of cardiac muscle cell membrane repolarization	2/45	26/18112	0.00188868	0.0288431	0.0214762	Nppa/Kcne1	2	0
BP	GO:0046337	phosphatidylethanolamine metabolic process	2/45	27/18112	0.00203655	0.0307222	0.0228753	Alox15/Pla2g2a	2	1.41421
BP	GO:0033762	response to glucagon	2/45	28/18112	0.00218975	0.0316424	0.0235605	Hmgcs2/Gcgr	2	0
BP	GO:1901018	positive regulation of potassium ion transmembrane transporter activity	2/45	28/18112	0.00218975	0.0316424	0.0235605	Nppa/Kcne1	2	0
BP	GO:0015908	fatty acid transport	3/45	104/18112	0.0021905	0.0316424	0.0235605	Slc2a1/Acsl6/Pla2g2a	3	-0.57735
BP	GO:0006006	glucose metabolic process	4/45	222/18112	0.00220813	0.0316424	0.0235605	Hk2/Pc/Pdk4/Gcgr	4	-1
BP	GO:0030258	lipid modification	4/45	223/18112	0.00224442	0.0316424	0.0235605	Decr1/Alox15/Pdk4/Cyp2e1	4	2
BP	GO:0007218	neuropeptide signaling pathway	3/45	105/18112	0.00225104	0.0316424	0.0235605	Penk/Nppa/Ntsr2	3	0.57735
BP	GO:0014074	response to purine-containing compound	4/45	227/18112	0.00239371	0.0329936	0.0245666	Hmgcs2/Penk/Kcne1/Igfbp5	4	0
BP	GO:0007568	aging	5/45	379/18112	0.00240051	0.0329936	0.0245666	Penk/Eno3/Aldoc/Ucp3/Igfbp5	5	0.447214
BP	GO:0046395	carboxylic acid catabolic process	4/45	228/18112	0.00243207	0.0330602	0.0246161	Decr1/Acot2/Bcat2/Cyp26b1	4	1
BP	GO:0016054	organic acid catabolic process	4/45	230/18112	0.00251008	0.0334134	0.0248791	Decr1/Acot2/Bcat2/Cyp26b1	4	1
BP	GO:0046486	glycerolipid metabolic process	5/45	383/18112	0.00251208	0.0334134	0.0248791	Pik3c2g/Alox15/Acsl6/Pla2g2a/Cyp2e1	5	1.34164
BP	GO:0099622	cardiac muscle cell membrane repolarization	2/45	31/18112	0.00268103	0.0352812	0.0262699	Nppa/Kcne1	2	0
BP	GO:0071375	cellular response to peptide hormone stimulus	5/45	390/18112	0.00271638	0.0353701	0.026336	Hmgcs2/Slc2a4/Acsl6/Pdk4/Gcgr	5	-0.447214
BP	GO:0019395	fatty acid oxidation	3/45	113/18112	0.00277295	0.0357306	0.0266045	Decr1/Alox15/Pdk4	3	1.73205
BP	GO:0006720	isoprenoid metabolic process	3/45	116/18112	0.0029863	0.0379182	0.0282333	Hmgcs2/Cyp2e1/Cyp26b1	3	1.73205
BP	GO:0035384	thioester biosynthetic process	2/45	33/18112	0.00303468	0.0379182	0.0282333	Acsl6/Pdk4	2	0
BP	GO:0071616	acyl-CoA biosynthetic process	2/45	33/18112	0.00303468	0.0379182	0.0282333	Acsl6/Pdk4	2	0
BP	GO:0060306	regulation of membrane repolarization	2/45	34/18112	0.00321927	0.0398223	0.0296512	Nppa/Kcne1	2	0
BP	GO:0006805	xenobiotic metabolic process	3/45	120/18112	0.00328613	0.0398524	0.0296735	Sult1a1/Cyp2e1/Cyp26b1	3	1.73205
BP	GO:0034440	lipid oxidation	3/45	120/18112	0.00328613	0.0398524	0.0296735	Decr1/Alox15/Pdk4	3	1.73205
BP	GO:0018149	peptide cross-linking	2/45	35/18112	0.003409	0.0409411	0.0304841	Col3a1/Tgm1	2	0
BP	GO:0019318	hexose metabolic process	4/45	252/18112	0.00348495	0.0414509	0.0308637	Hk2/Pc/Pdk4/Gcgr	4	-1
BP	GO:0072329	monocarboxylic acid catabolic process	3/45	124/18112	0.00360383	0.0420562	0.0313144	Decr1/Acot2/Cyp26b1	3	1.73205
BP	GO:0002675	positive regulation of acute inflammatory response	2/45	36/18112	0.00360384	0.0420562	0.0313144	Klk1/C2cd4b	2	0
BP	GO:0006084	acetyl-CoA metabolic process	2/45	37/18112	0.00380378	0.0435674	0.0324396	Hmgcs2/Pdk4	2	1.41421
BP	GO:0010667	negative regulation of cardiac muscle cell apoptotic process	2/45	37/18112	0.00380378	0.0435674	0.0324396	Acot1/Nupr1	2	1.41421
BP	GO:0032869	cellular response to insulin stimulus	4/45	261/18112	0.00394906	0.0448164	0.0333696	Hmgcs2/Slc2a4/Acsl6/Pdk4	4	0
BP	GO:0034764	positive regulation of transmembrane transport	4/45	263/18112	0.00405761	0.0456297	0.0339752	Nppa/Gpc3/Acsl6/Kcne1	4	0
BP	GO:0010664	negative regulation of striated muscle cell apoptotic process	2/45	40/18112	0.00443388	0.0491873	0.0366242	Acot1/Nupr1	2	1.41421
BP	GO:0005996	monosaccharide metabolic process	4/45	270/18112	0.0044535	0.0491873	0.0366242	Hk2/Pc/Pdk4/Gcgr	4	-1
BP	GO:0002526	acute inflammatory response	3/45	135/18112	0.00457226	0.050052	0.037268	Klk1/Nupr1/C2cd4b	3	0.57735
BP	GO:1901385	regulation of voltage-gated calcium channel activity	2/45	41/18112	0.00465392	0.0504991	0.0376009	Nppa/Kcne1	2	0
BP	GO:1901381	positive regulation of potassium ion transmembrane transport	2/45	44/18112	0.00534374	0.056613	0.0421532	Nppa/Kcne1	2	0
BP	GO:0046034	ATP metabolic process	4/45	286/18112	0.00545482	0.056613	0.0421532	Hk2/Eno3/Aldoc/Nupr1	4	0
BP	GO:0021762	substantia nigra development	2/45	45/18112	0.00558349	0.056613	0.0421532	Ckb/Eno3	2	-1.41421
BP	GO:0033866	nucleoside bisphosphate biosynthetic process	2/45	45/18112	0.00558349	0.056613	0.0421532	Acsl6/Pdk4	2	0
BP	GO:0034030	ribonucleoside bisphosphate biosynthetic process	2/45	45/18112	0.00558349	0.056613	0.0421532	Acsl6/Pdk4	2	0
BP	GO:0034033	purine nucleoside bisphosphate biosynthetic process	2/45	45/18112	0.00558349	0.056613	0.0421532	Acsl6/Pdk4	2	0
BP	GO:0085029	extracellular matrix assembly	2/45	45/18112	0.00558349	0.056613	0.0421532	Col3a1/Col1a2	2	-1.41421
BP	GO:0086009	membrane repolarization	2/45	45/18112	0.00558349	0.056613	0.0421532	Nppa/Kcne1	2	0
BP	GO:0050673	epithelial cell proliferation	5/45	465/18112	0.00572825	0.0576085	0.0428945	Gpc3/Wfdc1/Igfbp5/Tgm1/Nupr1	5	0.447214
BP	GO:0097305	response to alcohol	5/45	470/18112	0.00598919	0.059747	0.0444868	Hmgcs2/Slc2a4/Penk/Bdh1/Cyp2e1	5	0.447214
BP	GO:0050680	negative regulation of epithelial cell proliferation	3/45	154/18112	0.00658697	0.0651847	0.0485356	Gpc3/Wfdc1/Nupr1	3	0.57735
BP	GO:0051384	response to glucocorticoid	4/45	304/18112	0.00675041	0.0662719	0.0493451	Hmgcs2/Sult1a1/Bdh1/Ucp3	4	1
BP	GO:0070839	metal ion export	2/45	50/18112	0.00685475	0.0667663	0.0497133	Nppa/Kcne1	2	0
BP	GO:0060537	muscle tissue development	5/45	487/18112	0.00693946	0.0670634	0.0499345	Nppa/Igfbp5/Col3a1/Cyp26b1/Nupr1	5	0.447214
BP	GO:0071398	cellular response to fatty acid	2/45	51/18112	0.00712333	0.067974	0.0506124	Hmgcs2/Pdk4	2	1.41421
BP	GO:0044262	cellular carbohydrate metabolic process	4/45	309/18112	0.00714358	0.067974	0.0506124	Hk2/Pdk4/Gcgr/Nupr1	4	0
BP	GO:0009152	purine ribonucleotide biosynthetic process	3/45	163/18112	0.00769902	0.0726999	0.0541313	Nppa/Acsl6/Pdk4	3	0.57735
BP	GO:0071230	cellular response to amino acid stimulus	3/45	166/18112	0.00809287	0.0752698	0.0560448	Hmgcs2/Col3a1/Col1a2	3	-0.57735
BP	GO:1990845	adaptive thermogenesis	3/45	166/18112	0.00809287	0.0752698	0.0560448	Decr1/Ckb/Ucp3	3	0.57735
BP	GO:0043268	positive regulation of potassium ion transport	2/45	55/18112	0.00824459	0.0761087	0.0566694	Nppa/Kcne1	2	0
BP	GO:0014888	striated muscle adaptation	2/45	57/18112	0.00883307	0.080658	0.0600568	Nppa/Igfbp5	2	0
BP	GO:0016042	lipid catabolic process	4/45	329/18112	0.00886782	0.080658	0.0600568	Decr1/Acot2/Pla2g2a/Cyp26b1	4	2
BP	GO:0010675	regulation of cellular carbohydrate metabolic process	3/45	173/18112	0.0090576	0.0808287	0.0601839	Pdk4/Gcgr/Nupr1	3	0.57735
BP	GO:0002673	regulation of acute inflammatory response	2/45	58/18112	0.00913418	0.0808287	0.0601839	Klk1/C2cd4b	2	0
BP	GO:0071470	cellular response to osmotic stress	2/45	58/18112	0.00913418	0.0808287	0.0601839	Slc2a4/Slc2a1	2	-1.41421
BP	GO:0031960	response to corticosteroid	4/45	332/18112	0.00914795	0.0808287	0.0601839	Hmgcs2/Sult1a1/Bdh1/Ucp3	4	1
BP	GO:0008202	steroid metabolic process	4/45	334/18112	0.0093379	0.0819219	0.0609979	Hmgcs2/Sult1a1/Cyp2e1/Cyp26b1	4	2
BP	GO:0035107	appendage morphogenesis	3/45	176/18112	0.00949083	0.082099	0.0611297	Gpc3/Col3a1/Cyp26b1	3	0.57735
BP	GO:0035108	limb morphogenesis	3/45	176/18112	0.00949083	0.082099	0.0611297	Gpc3/Col3a1/Cyp26b1	3	0.57735
BP	GO:0009260	ribonucleotide biosynthetic process	3/45	177/18112	0.0096379	0.0826082	0.0615089	Nppa/Acsl6/Pdk4	3	0.57735
BP	GO:0010665	regulation of cardiac muscle cell apoptotic process	2/45	60/18112	0.00975004	0.0826082	0.0615089	Acot1/Nupr1	2	1.41421
BP	GO:0030199	collagen fibril organization	2/45	60/18112	0.00975004	0.0826082	0.0615089	Col3a1/Col1a2	2	-1.41421
BP	GO:0071229	cellular response to acid chemical	3/45	179/18112	0.00993603	0.0836114	0.0622558	Hmgcs2/Col3a1/Col1a2	3	-0.57735
BP	GO:0006164	purine nucleotide biosynthetic process	3/45	181/18112	0.0102395	0.085583	0.0637239	Nppa/Acsl6/Pdk4	3	0.57735
BP	GO:0060612	adipose tissue development	2/45	62/18112	0.0103839	0.0862075	0.0641889	Hmgcs2/Bdh1	2	0
BP	GO:0046390	ribose phosphate biosynthetic process	3/45	184/18112	0.0107048	0.0871399	0.0648831	Nppa/Acsl6/Pdk4	3	0.57735
BP	GO:0010662	regulation of striated muscle cell apoptotic process	2/45	63/18112	0.0107076	0.0871399	0.0648831	Acot1/Nupr1	2	1.41421
BP	GO:0050891	multicellular organismal water homeostasis	2/45	63/18112	0.0107076	0.0871399	0.0648831	Nppa/Cyp26b1	2	1.41421
BP	GO:0010656	negative regulation of muscle cell apoptotic process	2/45	65/18112	0.0113681	0.0907251	0.0675526	Acot1/Nupr1	2	1.41421
BP	GO:0010659	cardiac muscle cell apoptotic process	2/45	65/18112	0.0113681	0.0907251	0.0675526	Acot1/Nupr1	2	1.41421
BP	GO:0140115	export across plasma membrane	2/45	65/18112	0.0113681	0.0907251	0.0675526	Nppa/Kcne1	2	0
BP	GO:0072522	purine-containing compound biosynthetic process	3/45	189/18112	0.0115073	0.091247	0.0679412	Nppa/Acsl6/Pdk4	3	0.57735
BP	GO:0031424	keratinization	2/45	66/18112	0.011705	0.09164	0.0682338	Cyp26b1/Tgm1	2	1.41421
BP	GO:1901016	regulation of potassium ion transmembrane transporter activity	2/45	66/18112	0.011705	0.09164	0.0682338	Nppa/Kcne1	2	0
BP	GO:0010658	striated muscle cell apoptotic process	2/45	68/18112	0.0123919	0.0964072	0.0717834	Acot1/Nupr1	2	1.41421
BP	GO:0019369	arachidonic acid metabolic process	2/45	69/18112	0.0127418	0.09851	0.0733491	Alox15/Cyp2e1	2	1.41421
CC	GO:0005759	mitochondrial matrix	6/43	322/18418	9.634e-05	0.0103057	0.00811077	Hmgcs2/Acot2/Bdh1/Pc/Pdp2/Pdk4	6	0
CC	GO:0005583	fibrillar collagen trimer	2/43	11/18418	0.000288946	0.0103057	0.00811077	Col3a1/Col1a2	2	-1.41421
CC	GO:0098643	banded collagen fibril	2/43	11/18418	0.000288946	0.0103057	0.00811077	Col3a1/Col1a2	2	-1.41421
CC	GO:0005741	mitochondrial outer membrane	4/43	171/18418	0.000667503	0.0178557	0.0140527	Hk2/Mgst1/Acsl6/Pla2g2a	4	0
CC	GO:0098644	complex of collagen trimers	2/43	19/18418	0.000887767	0.0189982	0.0149519	Col3a1/Col1a2	2	-1.41421
CC	GO:0019867	outer membrane	4/43	211/18418	0.00145621	0.0222593	0.0175184	Hk2/Mgst1/Acsl6/Pla2g2a	4	0
CC	GO:0031968	organelle outer membrane	4/43	211/18418	0.00145621	0.0222593	0.0175184	Hk2/Mgst1/Acsl6/Pla2g2a	4	0
CC	GO:0005778	peroxisomal membrane	2/43	56/18418	0.00756971	0.0841324	0.0662134	Mgst1/Acsl6	2	0
CC	GO:0031903	microbody membrane	2/43	56/18418	0.00756971	0.0841324	0.0662134	Mgst1/Acsl6	2	0
CC	GO:0042383	sarcolemma	3/43	176/18418	0.0079987	0.0841324	0.0662134	Slc2a4/Slc2a1/Alox15	3	-0.57735
CC	GO:0005581	collagen trimer	2/43	60/18418	0.00864913	0.0841324	0.0662134	Col3a1/Col1a2	2	-1.41421
CC	GO:0016529	sarcoplasmic reticulum	2/43	69/18418	0.0113129	0.0943994	0.0742937	Hk2/Slc2a4	2	-1.41421
CC	GO:0043204	perikaryon	3/43	201/18418	0.0114691	0.0943994	0.0742937	Penk/Nppa/Ntsr2	3	0.57735
MF	GO:0048407	platelet-derived growth factor binding	2/45	11/16650	0.000386807	0.0571241	0.0451829	Col3a1/Col1a2	2	-1.41421
MF	GO:0016290	palmitoyl-CoA hydrolase activity	2/45	16/16650	0.000836714	0.0571241	0.0451829	Acot1/Acot2	2	1.41421
MF	GO:0005355	glucose transmembrane transporter activity	2/45	22/16650	0.00159415	0.0571241	0.0451829	Slc2a4/Slc2a1	2	-1.41421
MF	GO:0004602	glutathione peroxidase activity	2/45	23/16650	0.00174298	0.0571241	0.0451829	Mgst1/Gstt2	2	1.41421
MF	GO:0015149	hexose transmembrane transporter activity	2/45	23/16650	0.00174298	0.0571241	0.0451829	Slc2a4/Slc2a1	2	-1.41421
MF	GO:0015145	monosaccharide transmembrane transporter activity	2/45	27/16650	0.00240158	0.0571241	0.0451829	Slc2a4/Slc2a1	2	-1.41421
MF	GO:0047617	acyl-CoA hydrolase activity	2/45	28/16650	0.00258188	0.0571241	0.0451829	Acot1/Acot2	2	1.41421
MF	GO:0051119	sugar transmembrane transporter activity	2/45	28/16650	0.00258188	0.0571241	0.0451829	Slc2a4/Slc2a1	2	-1.41421
MF	GO:0016289	CoA hydrolase activity	2/45	30/16650	0.00296103	0.0582337	0.0460605	Acot1/Acot2	2	1.41421
MF	GO:0004364	glutathione transferase activity	2/45	33/16650	0.00357564	0.0632889	0.050059	Mgst1/Gstt2	2	1.41421
MF	GO:0015144	carbohydrate transmembrane transporter activity	2/45	40/16650	0.00521923	0.0839821	0.0664265	Slc2a4/Slc2a1	2	-1.41421
MF	GO:0016709	oxidoreductase activity, acting on paired donors, with incorporation or reduction of molecular oxygen, NAD(P)H as one donor, and incorporation of one atom of oxygen	2/45	47/16650	0.00714719	0.0909542	0.0719411	Cyp2e1/Cyp26b1	2	1.41421
MF	GO:0019838	growth factor binding	3/45	152/16650	0.00799677	0.0909542	0.0719411	Igfbp5/Col3a1/Col1a2	3	-1.73205
MF	GO:0004601	peroxidase activity	2/45	50/16650	0.00805783	0.0909542	0.0719411	Mgst1/Gstt2	2	1.41421
MF	GO:0015459	potassium channel regulator activity	2/45	52/16650	0.00869243	0.0909542	0.0719411	Alox15/Kcne1	2	0
MF	GO:0016790	thiolester hydrolase activity	2/45	52/16650	0.00869243	0.0909542	0.0719411	Acot1/Acot2	2	1.41421
MF	GO:0052689	carboxylic ester hydrolase activity	3/45	157/16650	0.00873571	0.0909542	0.0719411	Acot1/Acot2/Pla2g2a	3	1.73205
MF	GO:0016684	oxidoreductase activity, acting on peroxide as acceptor	2/45	54/16650	0.00934875	0.0919294	0.0727125	Mgst1/Gstt2	2	1.41421
Ontology: Classes, including Biological Process (BP), Cellular Component (CC), and Molecular Function (MF) ID: Function ID number Description: Name of the corresponding function GeneRatio: the total number of intersections between the input molecule and the molecules in the corresponding ID divided by the total number of intersections between the input molecule and the total number of molecules i…

## Sheet: Table SIII
Table SIII. KEGG pathway enrichment analysis of DEGs.
ONTOLOGY	ID	Description	GeneRatio	BgRatio	P-value	p.adjust	qvalue	geneID	Count	zscore
KEGG	rno04066	HIF-1 signaling pathway	5/34	114/8963	6.31812e-05	0.00650766	0.00525402	Hk2/Nppa/Eno3/Slc2a1/Aldoc	5	-0.447214
KEGG	rno05204	Chemical carcinogenesis - DNA adducts	4/34	76/8963	0.000182551	0.00693115	0.00559592	Sult1a1/Mgst1/Cyp2e1/Gstt2	4	2
KEGG	rno01230	Biosynthesis of amino acids	4/34	78/8963	0.000201878	0.00693115	0.00559592	Pc/Eno3/Aldoc/Bcat2	4	-1
KEGG	rno00591	Linoleic acid metabolism	3/34	40/8963	0.000447712	0.0115286	0.0093077	Alox15/Pla2g2a/Cyp2e1	3	1.73205
KEGG	rno01200	Carbon metabolism	4/34	119/8963	0.00100704	0.0201106	0.0162365	Hk2/Pc/Eno3/Aldoc	4	-1
KEGG	rno05415	Diabetic cardiomyopathy	5/34	214/8963	0.00117149	0.0201106	0.0162365	Slc2a4/Slc2a1/Pdk4/Col3a1/Col1a2	5	-1.34164
KEGG	rno00010	Glycolysis / Gluconeogenesis	3/34	68/8963	0.00211234	0.0296167	0.0239113	Hk2/Eno3/Aldoc	3	-0.57735
KEGG	rno04920	Adipocytokine signaling pathway	3/34	72/8963	0.00248793	0.0296167	0.0239113	Slc2a4/Slc2a1/Acsl6	3	-1.73205
KEGG	rno00982	Drug metabolism - cytochrome P450	3/34	73/8963	0.00258787	0.0296167	0.0239113	Mgst1/Cyp2e1/Gstt2	3	1.73205
KEGG	rno00980	Metabolism of xenobiotics by cytochrome P450	3/34	76/8963	0.0029025	0.0298957	0.0241365	Mgst1/Cyp2e1/Gstt2	3	1.73205
KEGG	rno00590	Arachidonic acid metabolism	3/34	82/8963	0.00360023	0.0337112	0.027217	Alox15/Pla2g2a/Cyp2e1	3	1.73205
KEGG	rno00650	Butanoate metabolism	2/34	27/8963	0.00461987	0.0396539	0.0320149	Hmgcs2/Bdh1	2	0
KEGG	rno00062	Fatty acid elongation	2/34	29/8963	0.00531851	0.0412191	0.0332786	Acot1/Acot2	2	1.41421
KEGG	rno00983	Drug metabolism - other enzymes	3/34	96/8963	0.0056026	0.0412191	0.0332786	Mgst1/Cyp2e1/Gstt2	3	1.73205
KEGG	rno01040	Biosynthesis of unsaturated fatty acids	2/34	34/8963	0.00726247	0.0498689	0.0402621	Acot1/Acot2	2	1.41421
KEGG	rno00051	Fructose and mannose metabolism	2/34	36/8963	0.0081172	0.0522545	0.0421881	Hk2/Aldoc	2	0
KEGG	rno04216	Ferroptosis	2/34	42/8963	0.0109372	0.0662668	0.053501	Alox15/Acsl6	2	0
KEGG	rno04930	Type II diabetes mellitus	2/34	49/8963	0.0146938	0.0840812	0.0678837	Hk2/Slc2a4	2	-1.41421
Ontology: KEGG ID: ID number of the corresponding pathway Description: Name of the corresponding pathway GeneRatio: The GeneRatio is calculated as the total number of intersections between the input molecule and the molecules in the corresponding ID divided by the total number of intersections between the input molecule and the total number of molecules in the library with pathway annotations. Bg…

## Sheet: Table SIV
Table SIV. Genes regulated by HK2 in the Sphingolipid signaling pathway and details on associated lipid metabolites.
geneID	GENE	metaID	Compounds	Class I	CID	coefficient	P-value	relationType
ENSMUSG00000045092	S1pr1	LIPID-P-1502	Cer(d18:0/24:0(2OH))	SP	C12126	0.862773	0.0269548	gene-meta
ENSMUSG00000067586	S1pr3	LIPID-P-1502	Cer(d18:0/24:0(2OH))	SP	C12126	0.862654	0.0270003	gene-meta
ENSMUSG00000061878	Sphk1	LIPID-P-1502	Cer(d18:0/24:0(2OH))	SP	C12126	0.866028	0.0257205	gene-meta
ENSMUSG00000021070	Bdkrb2	LIPID-P-1502	Cer(d18:0/24:0(2OH))	SP	C12126	0.852289	0.0311164	gene-meta
ENSMUSG00000051177	Plcb1	LIPID-P-1502	Cer(d18:0/24:0(2OH))	SP	C12126	0.841794	0.0355638	gene-meta
ENSMUSG00000008206	Cers4	LIPID-P-1502	Cer(d18:0/24:0(2OH))	SP	C12126	0.894055	0.0162418	gene-meta
ENSMUSG00000071369	Map3k5	LIPID-P-1502	Cer(d18:0/24:0(2OH))	SP	C12126	0.822516	0.0444555	gene-meta
ENSMUSG00000022875	Kng1	LIPID-P-1502	Cer(d18:0/24:0(2OH))	SP	C12126	0.877332	0.0216482	gene-meta
ENSMUSG00000052889	Prkcb	LIPID-P-1502	Cer(d18:0/24:0(2OH))	SP	C12126	-0.842286	0.035349	gene-meta
ENSMUSG00000032908	Sgpp2	LIPID-P-1502	Cer(d18:0/24:0(2OH))	SP	C12126	0.896669	0.0154643	gene-meta
ENSMUSG00000045092	S1pr1	LIPID-P-0105	Cer(d18:0/22:0)	SP	C12126	0.839539	0.0365559	gene-meta
ENSMUSG00000067586	S1pr3	LIPID-P-0105	Cer(d18:0/22:0)	SP	C12126	0.843704	0.0347334	gene-meta
ENSMUSG00000061878	Sphk1	LIPID-P-0105	Cer(d18:0/22:0)	SP	C12126	0.874511	0.0226332	gene-meta
ENSMUSG00000021070	Bdkrb2	LIPID-P-0105	Cer(d18:0/22:0)	SP	C12126	0.85352	0.0306129	gene-meta
ENSMUSG00000051177	Plcb1	LIPID-P-0105	Cer(d18:0/22:0)	SP	C12126	0.81541	0.0479655	gene-meta
ENSMUSG00000008206	Cers4	LIPID-P-0105	Cer(d18:0/22:0)	SP	C12126	0.893539	0.0163976	gene-meta
ENSMUSG00000022875	Kng1	LIPID-P-0105	Cer(d18:0/22:0)	SP	C12126	0.872771	0.023251	gene-meta
ENSMUSG00000052889	Prkcb	LIPID-P-0105	Cer(d18:0/22:0)	SP	C12126	-0.866562	0.0255206	gene-meta
ENSMUSG00000032908	Sgpp2	LIPID-P-0105	Cer(d18:0/22:0)	SP	C12126	0.875768	0.0221916	gene-meta
ENSMUSG00000008206	Cers4	LIPID-P-2051	Cer(d17:1/16:0)	SP	C00195	0.812763	0.0493045	gene-meta
ENSMUSG00000052889	Prkcb	LIPID-P-2051	Cer(d17:1/16:0)	SP	C00195	-0.883997	0.0194045	gene-meta
ENSMUSG00000045092	S1pr1	LIPID-P-2048	Cer(d16:1/26:1)	SP	C00195	0.944836	0.00448073	gene-meta
ENSMUSG00000067586	S1pr3	LIPID-P-2048	Cer(d16:1/26:1)	SP	C00195	0.918717	0.00964198	gene-meta
ENSMUSG00000060459	Kng2	LIPID-P-2048	Cer(d16:1/26:1)	SP	C00195	0.919523	0.00945414	gene-meta
ENSMUSG00000061878	Sphk1	LIPID-P-2048	Cer(d16:1/26:1)	SP	C00195	0.899377	0.0146782	gene-meta
ENSMUSG00000021070	Bdkrb2	LIPID-P-2048	Cer(d16:1/26:1)	SP	C00195	0.906941	0.0125871	gene-meta
ENSMUSG00000051177	Plcb1	LIPID-P-2048	Cer(d16:1/26:1)	SP	C00195	0.945673	0.00434693	gene-meta
ENSMUSG00000008206	Cers4	LIPID-P-2048	Cer(d16:1/26:1)	SP	C00195	0.85628	0.0294988	gene-meta
ENSMUSG00000071369	Map3k5	LIPID-P-2048	Cer(d16:1/26:1)	SP	C00195	0.919694	0.00941475	gene-meta
ENSMUSG00000052889	Prkcb	LIPID-P-2048	Cer(d16:1/26:1)	SP	C00195	-0.884166	0.0193493	gene-meta
ENSMUSG00000032908	Sgpp2	LIPID-P-2048	Cer(d16:1/26:1)	SP	C00195	0.904689	0.0131934	gene-meta
ENSMUSG00000045092	S1pr1	LIPID-P-0142	Cer(d18:2/24:1)	SP	C00195	0.858616	0.0285711	gene-meta
ENSMUSG00000067586	S1pr3	LIPID-P-0142	Cer(d18:2/24:1)	SP	C00195	0.84471	0.0342999	gene-meta
ENSMUSG00000061878	Sphk1	LIPID-P-0142	Cer(d18:2/24:1)	SP	C00195	0.849006	0.0324773	gene-meta
ENSMUSG00000021070	Bdkrb2	LIPID-P-0142	Cer(d18:2/24:1)	SP	C00195	0.843458	0.03484	gene-meta
ENSMUSG00000051177	Plcb1	LIPID-P-0142	Cer(d18:2/24:1)	SP	C00195	0.838141	0.0371774	gene-meta
ENSMUSG00000008206	Cers4	LIPID-P-0142	Cer(d18:2/24:1)	SP	C00195	0.89272	0.0166462	gene-meta
ENSMUSG00000071369	Map3k5	LIPID-P-0142	Cer(d18:2/24:1)	SP	C00195	0.818384	0.0464815	gene-meta
ENSMUSG00000022875	Kng1	LIPID-P-0142	Cer(d18:2/24:1)	SP	C00195	0.859401	0.0282622	gene-meta
ENSMUSG00000052889	Prkcb	LIPID-P-0142	Cer(d18:2/24:1)	SP	C00195	-0.865914	0.0257633	gene-meta
ENSMUSG00000032908	Sgpp2	LIPID-P-0142	Cer(d18:2/24:1)	SP	C00195	0.849943	0.0320864	gene-meta
ENSMUSG00000045092	S1pr1	LIPID-P-0141	Cer(d18:2/24:0)	SP	C00195	0.89908	0.0147634	gene-meta
ENSMUSG00000067586	S1pr3	LIPID-P-0141	Cer(d18:2/24:0)	SP	C00195	0.874531	0.0226261	gene-meta
ENSMUSG00000060459	Kng2	LIPID-P-0141	Cer(d18:2/24:0)	SP	C00195	0.828089	0.0417897	gene-meta
ENSMUSG00000061878	Sphk1	LIPID-P-0141	Cer(d18:2/24:0)	SP	C00195	0.859382	0.02827	gene-meta
ENSMUSG00000021070	Bdkrb2	LIPID-P-0141	Cer(d18:2/24:0)	SP	C00195	0.881926	0.0200892	gene-meta
ENSMUSG00000051177	Plcb1	LIPID-P-0141	Cer(d18:2/24:0)	SP	C00195	0.885146	0.0190295	gene-meta
ENSMUSG00000008206	Cers4	LIPID-P-0141	Cer(d18:2/24:0)	SP	C00195	0.938786	0.00550604	gene-meta
ENSMUSG00000071369	Map3k5	LIPID-P-0141	Cer(d18:2/24:0)	SP	C00195	0.88492	0.0191032	gene-meta
ENSMUSG00000039936	Pik3cd	LIPID-P-0141	Cer(d18:2/24:0)	SP	C00195	0.83305	0.0394816	gene-meta
ENSMUSG00000022875	Kng1	LIPID-P-0141	Cer(d18:2/24:0)	SP	C00195	0.895431	0.0158304	gene-meta
ENSMUSG00000052889	Prkcb	LIPID-P-0141	Cer(d18:2/24:0)	SP	C00195	-0.888951	0.0178131	gene-meta
ENSMUSG00000045092	S1pr1	LIPID-P-0139	Cer(d18:2/22:0)	SP	C00195	0.888451	0.0179706	gene-meta
ENSMUSG00000067586	S1pr3	LIPID-P-0139	Cer(d18:2/22:0)	SP	C00195	0.888521	0.0179487	gene-meta
ENSMUSG00000060459	Kng2	LIPID-P-0139	Cer(d18:2/22:0)	SP	C00195	0.813609	0.0488749	gene-meta
ENSMUSG00000061878	Sphk1	LIPID-P-0139	Cer(d18:2/22:0)	SP	C00195	0.884721	0.0191678	gene-meta
ENSMUSG00000021070	Bdkrb2	LIPID-P-0139	Cer(d18:2/22:0)	SP	C00195	0.875572	0.0222601	gene-meta
ENSMUSG00000051177	Plcb1	LIPID-P-0139	Cer(d18:2/22:0)	SP	C00195	0.869003	0.0246165	gene-meta
ENSMUSG00000008206	Cers4	LIPID-P-0139	Cer(d18:2/22:0)	SP	C00195	0.916519	0.0101626	gene-meta
ENSMUSG00000071369	Map3k5	LIPID-P-0139	Cer(d18:2/22:0)	SP	C00195	0.853673	0.030551	gene-meta
ENSMUSG00000039936	Pik3cd	LIPID-P-0139	Cer(d18:2/22:0)	SP	C00195	0.830807	0.0405179	gene-meta
ENSMUSG00000022875	Kng1	LIPID-P-0139	Cer(d18:2/22:0)	SP	C00195	0.90093	0.0142361	gene-meta
ENSMUSG00000052889	Prkcb	LIPID-P-0139	Cer(d18:2/22:0)	SP	C00195	-0.85239	0.031075	gene-meta
ENSMUSG00000032908	Sgpp2	LIPID-P-0139	Cer(d18:2/22:0)	SP	C00195	0.903646	0.013479	gene-meta
ENSMUSG00000045092	S1pr1	LIPID-P-0114	Cer(d18:1/21:0)	SP	C00195	0.897541	0.0152089	gene-meta
ENSMUSG00000067586	S1pr3	LIPID-P-0114	Cer(d18:1/21:0)	SP	C00195	0.90832	0.0122225	gene-meta
ENSMUSG00000060459	Kng2	LIPID-P-0114	Cer(d18:1/21:0)	SP	C00195	0.869555	0.0244139	gene-meta
ENSMUSG00000061878	Sphk1	LIPID-P-0114	Cer(d18:1/21:0)	SP	C00195	0.960171	0.00234796	gene-meta
ENSMUSG00000021070	Bdkrb2	LIPID-P-0114	Cer(d18:1/21:0)	SP	C00195	0.952025	0.00339714	gene-meta
ENSMUSG00000051177	Plcb1	LIPID-P-0114	Cer(d18:1/21:0)	SP	C00195	0.882135	0.0200195	gene-meta
ENSMUSG00000008206	Cers4	LIPID-P-0114	Cer(d18:1/21:0)	SP	C00195	0.949193	0.00380643	gene-meta
ENSMUSG00000071369	Map3k5	LIPID-P-0114	Cer(d18:1/21:0)	SP	C00195	0.871991	0.0235307	gene-meta
ENSMUSG00000039936	Pik3cd	LIPID-P-0114	Cer(d18:1/21:0)	SP	C00195	0.868158	0.0249275	gene-meta
ENSMUSG00000022875	Kng1	LIPID-P-0114	Cer(d18:1/21:0)	SP	C00195	0.912716	0.0110952	gene-meta
ENSMUSG00000052889	Prkcb	LIPID-P-0114	Cer(d18:1/21:0)	SP	C00195	-0.938793	0.00550482	gene-meta
ENSMUSG00000032908	Sgpp2	LIPID-P-0114	Cer(d18:1/21:0)	SP	C00195	0.821612	0.0448952	gene-meta
ENSMUSG00000008206	Cers4	LIPID-P-0136	Cer(d18:2/18:0)	SP	C00195	0.813076	0.0491453	gene-meta
ENSMUSG00000052889	Prkcb	LIPID-P-0136	Cer(d18:2/18:0)	SP	C00195	-0.85108	0.0316145	gene-meta
ENSMUSG00000045092	S1pr1	LIPID-P-0125	Cer(d18:1/26:1)	SP	C00195	0.938672	0.00552634	gene-meta
ENSMUSG00000067586	S1pr3	LIPID-P-0125	Cer(d18:1/26:1)	SP	C00195	0.936542	0.00591267	gene-meta
ENSMUSG00000060459	Kng2	LIPID-P-0125	Cer(d18:1/26:1)	SP	C00195	0.875088	0.0224301	gene-meta
ENSMUSG00000061878	Sphk1	LIPID-P-0125	Cer(d18:1/26:1)	SP	C00195	0.92991	0.00719667	gene-meta
ENSMUSG00000021070	Bdkrb2	LIPID-P-0125	Cer(d18:1/26:1)	SP	C00195	0.930868	0.00700368	gene-meta
ENSMUSG00000051177	Plcb1	LIPID-P-0125	Cer(d18:1/26:1)	SP	C00195	0.922317	0.0088176	gene-meta
ENSMUSG00000008206	Cers4	LIPID-P-0125	Cer(d18:1/26:1)	SP	C00195	0.966453	0.00166923	gene-meta
ENSMUSG00000071369	Map3k5	LIPID-P-0125	Cer(d18:1/26:1)	SP	C00195	0.914025	0.0107699	gene-meta
ENSMUSG00000039936	Pik3cd	LIPID-P-0125	Cer(d18:1/26:1)	SP	C00195	0.890224	0.0174148	gene-meta
ENSMUSG00000022875	Kng1	LIPID-P-0125	Cer(d18:1/26:1)	SP	C00195	0.944332	0.00456211	gene-meta
ENSMUSG00000052889	Prkcb	LIPID-P-0125	Cer(d18:1/26:1)	SP	C00195	-0.897306	0.0152776	gene-meta
ENSMUSG00000032908	Sgpp2	LIPID-P-0125	Cer(d18:1/26:1)	SP	C00195	0.896059	0.015644	gene-meta
ENSMUSG00000045092	S1pr1	LIPID-P-0124	Cer(d18:1/24:1)	SP	C00195	0.903105	0.0136282	gene-meta
ENSMUSG00000067586	S1pr3	LIPID-P-0124	Cer(d18:1/24:1)	SP	C00195	0.902097	0.0139082	gene-meta
ENSMUSG00000060459	Kng2	LIPID-P-0124	Cer(d18:1/24:1)	SP	C00195	0.827324	0.0421509	gene-meta
ENSMUSG00000061878	Sphk1	LIPID-P-0124	Cer(d18:1/24:1)	SP	C00195	0.901856	0.0139758	gene-meta
ENSMUSG00000021070	Bdkrb2	LIPID-P-0124	Cer(d18:1/24:1)	SP	C00195	0.901428	0.0140958	gene-meta
ENSMUSG00000051177	Plcb1	LIPID-P-0124	Cer(d18:1/24:1)	SP	C00195	0.882505	0.0198965	gene-meta
ENSMUSG00000008206	Cers4	LIPID-P-0124	Cer(d18:1/24:1)	SP	C00195	0.95908	0.00247742	gene-meta
ENSMUSG00000071369	Map3k5	LIPID-P-0124	Cer(d18:1/24:1)	SP	C00195	0.876214	0.0220362	gene-meta
ENSMUSG00000039936	Pik3cd	LIPID-P-0124	Cer(d18:1/24:1)	SP	C00195	0.866897	0.0253957	gene-meta
ENSMUSG00000022875	Kng1	LIPID-P-0124	Cer(d18:1/24:1)	SP	C00195	0.942777	0.00481806	gene-meta
ENSMUSG00000052889	Prkcb	LIPID-P-0124	Cer(d18:1/24:1)	SP	C00195	-0.882568	0.0198758	gene-meta
ENSMUSG00000032908	Sgpp2	LIPID-P-0124	Cer(d18:1/24:1)	SP	C00195	0.858359	0.0286723	gene-meta
ENSMUSG00000045092	S1pr1	LIPID-P-0123	Cer(d18:1/22:1)	SP	C00195	0.935746	0.00606025	gene-meta
ENSMUSG00000067586	S1pr3	LIPID-P-0123	Cer(d18:1/22:1)	SP	C00195	0.936011	0.00601096	gene-meta
ENSMUSG00000060459	Kng2	LIPID-P-0123	Cer(d18:1/22:1)	SP	C00195	0.872877	0.0232132	gene-meta
ENSMUSG00000061878	Sphk1	LIPID-P-0123	Cer(d18:1/22:1)	SP	C00195	0.935281	0.00614723	gene-meta
ENSMUSG00000021070	Bdkrb2	LIPID-P-0123	Cer(d18:1/22:1)	SP	C00195	0.935858	0.00603927	gene-meta
ENSMUSG00000051177	Plcb1	LIPID-P-0123	Cer(d18:1/22:1)	SP	C00195	0.918383	0.00972017	gene-meta
ENSMUSG00000008206	Cers4	LIPID-P-0123	Cer(d18:1/22:1)	SP	C00195	0.974679	0.000953639	gene-meta
ENSMUSG00000071369	Map3k5	LIPID-P-0123	Cer(d18:1/22:1)	SP	C00195	0.911768	0.0113339	gene-meta
ENSMUSG00000039936	Pik3cd	LIPID-P-0123	Cer(d18:1/22:1)	SP	C00195	0.896636	0.015474	gene-meta
ENSMUSG00000022875	Kng1	LIPID-P-0123	Cer(d18:1/22:1)	SP	C00195	0.954075	0.00311518	gene-meta
ENSMUSG00000052889	Prkcb	LIPID-P-0123	Cer(d18:1/22:1)	SP	C00195	-0.903677	0.0134702	gene-meta
ENSMUSG00000032908	Sgpp2	LIPID-P-0123	Cer(d18:1/22:1)	SP	C00195	0.885016	0.0190718	gene-meta
ENSMUSG00000045092	S1pr1	LIPID-P-0119	Cer(d18:1/26:0)	SP	C00195	0.920695	0.00918455	gene-meta
ENSMUSG00000067586	S1pr3	LIPID-P-0119	Cer(d18:1/26:0)	SP	C00195	0.916898	0.010072	gene-meta
ENSMUSG00000060459	Kng2	LIPID-P-0119	Cer(d18:1/26:0)	SP	C00195	0.854331	0.0302837	gene-meta
ENSMUSG00000061878	Sphk1	LIPID-P-0119	Cer(d18:1/26:0)	SP	C00195	0.903026	0.0136501	gene-meta
ENSMUSG00000021070	Bdkrb2	LIPID-P-0119	Cer(d18:1/26:0)	SP	C00195	0.899287	0.0147039	gene-meta
ENSMUSG00000051177	Plcb1	LIPID-P-0119	Cer(d18:1/26:0)	SP	C00195	0.905188	0.0130578	gene-meta
ENSMUSG00000008206	Cers4	LIPID-P-0119	Cer(d18:1/26:0)	SP	C00195	0.927172	0.00776274	gene-meta
ENSMUSG00000071369	Map3k5	LIPID-P-0119	Cer(d18:1/26:0)	SP	C00195	0.890666	0.0172774	gene-meta
ENSMUSG00000039936	Pik3cd	LIPID-P-0119	Cer(d18:1/26:0)	SP	C00195	0.853634	0.0305669	gene-meta
ENSMUSG00000022875	Kng1	LIPID-P-0119	Cer(d18:1/26:0)	SP	C00195	0.905515	0.0129693	gene-meta
ENSMUSG00000052889	Prkcb	LIPID-P-0119	Cer(d18:1/26:0)	SP	C00195	-0.864871	0.0261559	gene-meta
ENSMUSG00000032908	Sgpp2	LIPID-P-0119	Cer(d18:1/26:0)	SP	C00195	0.920026	0.00933791	gene-meta
ENSMUSG00000045092	S1pr1	LIPID-P-0137	Cer(d18:2/20:0)	SP	C00195	0.887668	0.0182189	gene-meta
ENSMUSG00000067586	S1pr3	LIPID-P-0137	Cer(d18:2/20:0)	SP	C00195	0.89811	0.0150436	gene-meta
ENSMUSG00000060459	Kng2	LIPID-P-0137	Cer(d18:2/20:0)	SP	C00195	0.831329	0.0402757	gene-meta
ENSMUSG00000061878	Sphk1	LIPID-P-0137	Cer(d18:2/20:0)	SP	C00195	0.88545	0.0189309	gene-meta
ENSMUSG00000021070	Bdkrb2	LIPID-P-0137	Cer(d18:2/20:0)	SP	C00195	0.904227	0.0133194	gene-meta
ENSMUSG00000051177	Plcb1	LIPID-P-0137	Cer(d18:2/20:0)	SP	C00195	0.86945	0.0244525	gene-meta
ENSMUSG00000008206	Cers4	LIPID-P-0137	Cer(d18:2/20:0)	SP	C00195	0.983405	0.000410809	gene-meta
ENSMUSG00000071369	Map3k5	LIPID-P-0137	Cer(d18:2/20:0)	SP	C00195	0.89079	0.0172389	gene-meta
ENSMUSG00000039936	Pik3cd	LIPID-P-0137	Cer(d18:2/20:0)	SP	C00195	0.938063	0.00563552	gene-meta
ENSMUSG00000022875	Kng1	LIPID-P-0137	Cer(d18:2/20:0)	SP	C00195	0.98803	0.000214079	gene-meta
ENSMUSG00000052889	Prkcb	LIPID-P-0137	Cer(d18:2/20:0)	SP	C00195	-0.835493	0.0383676	gene-meta
ENSMUSG00000045092	S1pr1	LIPID-P-0116	Cer(d18:1/23:0)	SP	C00195	0.897225	0.0153013	gene-meta
ENSMUSG00000067586	S1pr3	LIPID-P-0116	Cer(d18:1/23:0)	SP	C00195	0.896253	0.0155869	gene-meta
ENSMUSG00000060459	Kng2	LIPID-P-0116	Cer(d18:1/23:0)	SP	C00195	0.820754	0.0453141	gene-meta
ENSMUSG00000061878	Sphk1	LIPID-P-0116	Cer(d18:1/23:0)	SP	C00195	0.896216	0.0155978	gene-meta
ENSMUSG00000021070	Bdkrb2	LIPID-P-0116	Cer(d18:1/23:0)	SP	C00195	0.891951	0.016881	gene-meta
ENSMUSG00000051177	Plcb1	LIPID-P-0116	Cer(d18:1/23:0)	SP	C00195	0.876732	0.0218559	gene-meta
ENSMUSG00000008206	Cers4	LIPID-P-0116	Cer(d18:1/23:0)	SP	C00195	0.943731	0.00466023	gene-meta
ENSMUSG00000071369	Map3k5	LIPID-P-0116	Cer(d18:1/23:0)	SP	C00195	0.866348	0.0256006	gene-meta
ENSMUSG00000039936	Pik3cd	LIPID-P-0116	Cer(d18:1/23:0)	SP	C00195	0.850942	0.0316717	gene-meta
ENSMUSG00000022875	Kng1	LIPID-P-0116	Cer(d18:1/23:0)	SP	C00195	0.926859	0.00782883	gene-meta
ENSMUSG00000052889	Prkcb	LIPID-P-0116	Cer(d18:1/23:0)	SP	C00195	-0.874617	0.0225957	gene-meta
ENSMUSG00000032908	Sgpp2	LIPID-P-0116	Cer(d18:1/23:0)	SP	C00195	0.876374	0.0219802	gene-meta
ENSMUSG00000045092	S1pr1	LIPID-P-0115	Cer(d18:1/22:0)	SP	C00195	0.947822	0.00401273	gene-meta
ENSMUSG00000067586	S1pr3	LIPID-P-0115	Cer(d18:1/22:0)	SP	C00195	0.946908	0.00415336	gene-meta
ENSMUSG00000060459	Kng2	LIPID-P-0115	Cer(d18:1/22:0)	SP	C00195	0.889021	0.0177912	gene-meta
ENSMUSG00000061878	Sphk1	LIPID-P-0115	Cer(d18:1/22:0)	SP	C00195	0.938073	0.0056336	gene-meta
ENSMUSG00000021070	Bdkrb2	LIPID-P-0115	Cer(d18:1/22:0)	SP	C00195	0.938677	0.00552541	gene-meta
ENSMUSG00000051177	Plcb1	LIPID-P-0115	Cer(d18:1/22:0)	SP	C00195	0.932778	0.00662637	gene-meta
ENSMUSG00000008206	Cers4	LIPID-P-0115	Cer(d18:1/22:0)	SP	C00195	0.966689	0.00164592	gene-meta
ENSMUSG00000071369	Map3k5	LIPID-P-0115	Cer(d18:1/22:0)	SP	C00195	0.924094	0.00842395	gene-meta
ENSMUSG00000039936	Pik3cd	LIPID-P-0115	Cer(d18:1/22:0)	SP	C00195	0.898818	0.0148387	gene-meta
ENSMUSG00000022875	Kng1	LIPID-P-0115	Cer(d18:1/22:0)	SP	C00195	0.944773	0.00449084	gene-meta
ENSMUSG00000052889	Prkcb	LIPID-P-0115	Cer(d18:1/22:0)	SP	C00195	-0.896788	0.0154292	gene-meta
ENSMUSG00000032908	Sgpp2	LIPID-P-0115	Cer(d18:1/22:0)	SP	C00195	0.910082	0.0117643	gene-meta
ENSMUSG00000008206	Cers4	LIPID-P-2053	Cer(d17:1/18:0)	SP	C00195	0.888365	0.0179981	gene-meta
ENSMUSG00000022875	Kng1	LIPID-P-2053	Cer(d17:1/18:0)	SP	C00195	0.851555	0.0314183	gene-meta
ENSMUSG00000052889	Prkcb	LIPID-P-2053	Cer(d17:1/18:0)	SP	C00195	-0.846744	0.0334314	gene-meta
ENSMUSG00000045092	S1pr1	LIPID-P-0113	Cer(d18:1/20:0)	SP	C00195	0.949914	0.00370002	gene-meta
ENSMUSG00000067586	S1pr3	LIPID-P-0113	Cer(d18:1/20:0)	SP	C00195	0.949614	0.0037442	gene-meta
ENSMUSG00000060459	Kng2	LIPID-P-0113	Cer(d18:1/20:0)	SP	C00195	0.892571	0.0166915	gene-meta
ENSMUSG00000061878	Sphk1	LIPID-P-0113	Cer(d18:1/20:0)	SP	C00195	0.944794	0.0044874	gene-meta
ENSMUSG00000021070	Bdkrb2	LIPID-P-0113	Cer(d18:1/20:0)	SP	C00195	0.945759	0.00433339	gene-meta
ENSMUSG00000051177	Plcb1	LIPID-P-0113	Cer(d18:1/20:0)	SP	C00195	0.934643	0.00626768	gene-meta
ENSMUSG00000008206	Cers4	LIPID-P-0113	Cer(d18:1/20:0)	SP	C00195	0.973878	0.0010146	gene-meta
ENSMUSG00000071369	Map3k5	LIPID-P-0113	Cer(d18:1/20:0)	SP	C00195	0.926786	0.00784423	gene-meta
ENSMUSG00000039936	Pik3cd	LIPID-P-0113	Cer(d18:1/20:0)	SP	C00195	0.904221	0.013321	gene-meta
ENSMUSG00000022875	Kng1	LIPID-P-0113	Cer(d18:1/20:0)	SP	C00195	0.950984	0.00354504	gene-meta
ENSMUSG00000052889	Prkcb	LIPID-P-0113	Cer(d18:1/20:0)	SP	C00195	-0.905909	0.0128631	gene-meta
ENSMUSG00000032908	Sgpp2	LIPID-P-0113	Cer(d18:1/20:0)	SP	C00195	0.903567	0.0135006	gene-meta
ENSMUSG00000045092	S1pr1	LIPID-P-0111	Cer(d18:1/18:0)	SP	C00195	0.89835	0.0149738	gene-meta
ENSMUSG00000067586	S1pr3	LIPID-P-0111	Cer(d18:1/18:0)	SP	C00195	0.89389	0.0162917	gene-meta
ENSMUSG00000060459	Kng2	LIPID-P-0111	Cer(d18:1/18:0)	SP	C00195	0.822326	0.0445474	gene-meta
ENSMUSG00000061878	Sphk1	LIPID-P-0111	Cer(d18:1/18:0)	SP	C00195	0.898879	0.0148213	gene-meta
ENSMUSG00000021070	Bdkrb2	LIPID-P-0111	Cer(d18:1/18:0)	SP	C00195	0.904344	0.0132874	gene-meta
ENSMUSG00000051177	Plcb1	LIPID-P-0111	Cer(d18:1/18:0)	SP	C00195	0.877415	0.0216197	gene-meta
ENSMUSG00000008206	Cers4	LIPID-P-0111	Cer(d18:1/18:0)	SP	C00195	0.970297	0.00131028	gene-meta
ENSMUSG00000071369	Map3k5	LIPID-P-0111	Cer(d18:1/18:0)	SP	C00195	0.87541	0.0223171	gene-meta
ENSMUSG00000039936	Pik3cd	LIPID-P-0111	Cer(d18:1/18:0)	SP	C00195	0.867822	0.0250519	gene-meta
ENSMUSG00000022875	Kng1	LIPID-P-0111	Cer(d18:1/18:0)	SP	C00195	0.948821	0.00386184	gene-meta
ENSMUSG00000052889	Prkcb	LIPID-P-0111	Cer(d18:1/18:0)	SP	C00195	-0.897849	0.0151194	gene-meta
ENSMUSG00000032908	Sgpp2	LIPID-P-0111	Cer(d18:1/18:0)	SP	C00195	0.811756	0.0498186	gene-meta
ENSMUSG00000045092	S1pr1	LIPID-P-0110	Cer(d18:1/17:0)	SP	C00195	0.870886	0.0239296	gene-meta
ENSMUSG00000067586	S1pr3	LIPID-P-0110	Cer(d18:1/17:0)	SP	C00195	0.861204	0.0275594	gene-meta
ENSMUSG00000061878	Sphk1	LIPID-P-0110	Cer(d18:1/17:0)	SP	C00195	0.870268	0.0241539	gene-meta
ENSMUSG00000021070	Bdkrb2	LIPID-P-0110	Cer(d18:1/17:0)	SP	C00195	0.878579	0.0212194	gene-meta
ENSMUSG00000051177	Plcb1	LIPID-P-0110	Cer(d18:1/17:0)	SP	C00195	0.848657	0.0326238	gene-meta
ENSMUSG00000008206	Cers4	LIPID-P-0110	Cer(d18:1/17:0)	SP	C00195	0.955652	0.0029065	gene-meta
ENSMUSG00000071369	Map3k5	LIPID-P-0110	Cer(d18:1/17:0)	SP	C00195	0.847374	0.0331642	gene-meta
ENSMUSG00000039936	Pik3cd	LIPID-P-0110	Cer(d18:1/17:0)	SP	C00195	0.835894	0.0381863	gene-meta
ENSMUSG00000022875	Kng1	LIPID-P-0110	Cer(d18:1/17:0)	SP	C00195	0.929398	0.00730097	gene-meta
ENSMUSG00000052889	Prkcb	LIPID-P-0110	Cer(d18:1/17:0)	SP	C00195	-0.892676	0.0166595	gene-meta
ENSMUSG00000045092	S1pr1	LIPID-P-0109	Cer(d18:1/16:0)	SP	C00195	0.888616	0.0179186	gene-meta
ENSMUSG00000067586	S1pr3	LIPID-P-0109	Cer(d18:1/16:0)	SP	C00195	0.881638	0.0201853	gene-meta
ENSMUSG00000061878	Sphk1	LIPID-P-0109	Cer(d18:1/16:0)	SP	C00195	0.887754	0.0181917	gene-meta
ENSMUSG00000021070	Bdkrb2	LIPID-P-0109	Cer(d18:1/16:0)	SP	C00195	0.891899	0.0168973	gene-meta
ENSMUSG00000051177	Plcb1	LIPID-P-0109	Cer(d18:1/16:0)	SP	C00195	0.867111	0.0253158	gene-meta
ENSMUSG00000008206	Cers4	LIPID-P-0109	Cer(d18:1/16:0)	SP	C00195	0.959107	0.0024742	gene-meta
ENSMUSG00000071369	Map3k5	LIPID-P-0109	Cer(d18:1/16:0)	SP	C00195	0.862454	0.0270771	gene-meta
ENSMUSG00000039936	Pik3cd	LIPID-P-0109	Cer(d18:1/16:0)	SP	C00195	0.848184	0.0328227	gene-meta
ENSMUSG00000022875	Kng1	LIPID-P-0109	Cer(d18:1/16:0)	SP	C00195	0.935042	0.00619234	gene-meta
ENSMUSG00000052889	Prkcb	LIPID-P-0109	Cer(d18:1/16:0)	SP	C00195	-0.89513	0.01592	gene-meta
ENSMUSG00000045092	S1pr1	LIPID-P-0117	Cer(d18:1/24:0)	SP	C00195	0.941897	0.00496592	gene-meta
ENSMUSG00000067586	S1pr3	LIPID-P-0117	Cer(d18:1/24:0)	SP	C00195	0.937734	0.00569496	gene-meta
ENSMUSG00000060459	Kng2	LIPID-P-0117	Cer(d18:1/24:0)	SP	C00195	0.879389	0.0209433	gene-meta
ENSMUSG00000061878	Sphk1	LIPID-P-0117	Cer(d18:1/24:0)	SP	C00195	0.933908	0.00640778	gene-meta
ENSMUSG00000021070	Bdkrb2	LIPID-P-0117	Cer(d18:1/24:0)	SP	C00195	0.935522	0.00610209	gene-meta
ENSMUSG00000051177	Plcb1	LIPID-P-0117	Cer(d18:1/24:0)	SP	C00195	0.925954	0.00802126	gene-meta
ENSMUSG00000008206	Cers4	LIPID-P-0117	Cer(d18:1/24:0)	SP	C00195	0.968142	0.0015062	gene-meta
ENSMUSG00000071369	Map3k5	LIPID-P-0117	Cer(d18:1/24:0)	SP	C00195	0.916713	0.0101163	gene-meta
ENSMUSG00000039936	Pik3cd	LIPID-P-0117	Cer(d18:1/24:0)	SP	C00195	0.887276	0.0183438	gene-meta
ENSMUSG00000022875	Kng1	LIPID-P-0117	Cer(d18:1/24:0)	SP	C00195	0.941462	0.00503983	gene-meta
ENSMUSG00000052889	Prkcb	LIPID-P-0117	Cer(d18:1/24:0)	SP	C00195	-0.908169	0.0122622	gene-meta
ENSMUSG00000032908	Sgpp2	LIPID-P-0117	Cer(d18:1/24:0)	SP	C00195	0.892661	0.0166641	gene-meta
ENSMUSG00000045092	S1pr1	LIPID-P-2087	Cer(d18:2/26:1)	SP	C00195	0.876418	0.0219652	gene-meta
ENSMUSG00000067586	S1pr3	LIPID-P-2087	Cer(d18:2/26:1)	SP	C00195	0.864573	0.0262689	gene-meta
ENSMUSG00000060459	Kng2	LIPID-P-2087	Cer(d18:2/26:1)	SP	C00195	0.81153	0.0499343	gene-meta
ENSMUSG00000061878	Sphk1	LIPID-P-2087	Cer(d18:2/26:1)	SP	C00195	0.851805	0.0313152	gene-meta
ENSMUSG00000021070	Bdkrb2	LIPID-P-2087	Cer(d18:2/26:1)	SP	C00195	0.840929	0.0359429	gene-meta
ENSMUSG00000051177	Plcb1	LIPID-P-2087	Cer(d18:2/26:1)	SP	C00195	0.863733	0.026588	gene-meta
ENSMUSG00000008206	Cers4	LIPID-P-2087	Cer(d18:2/26:1)	SP	C00195	0.843978	0.0346154	gene-meta
ENSMUSG00000071369	Map3k5	LIPID-P-2087	Cer(d18:2/26:1)	SP	C00195	0.835414	0.0384035	gene-meta
ENSMUSG00000052889	Prkcb	LIPID-P-2087	Cer(d18:2/26:1)	SP	C00195	-0.82741	0.0421106	gene-meta
ENSMUSG00000032908	Sgpp2	LIPID-P-2087	Cer(d18:2/26:1)	SP	C00195	0.927485	0.00769688	gene-meta
ENSMUSG00000045092	S1pr1	LIPID-P-2096	Cer(d19:1/24:1)	SP	C00195	0.873179	0.0231054	gene-meta
ENSMUSG00000067586	S1pr3	LIPID-P-2096	Cer(d19:1/24:1)	SP	C00195	0.86361	0.0266348	gene-meta
ENSMUSG00000061878	Sphk1	LIPID-P-2096	Cer(d19:1/24:1)	SP	C00195	0.856265	0.0295048	gene-meta
ENSMUSG00000021070	Bdkrb2	LIPID-P-2096	Cer(d19:1/24:1)	SP	C00195	0.855355	0.0298703	gene-meta
ENSMUSG00000051177	Plcb1	LIPID-P-2096	Cer(d19:1/24:1)	SP	C00195	0.85257	0.031001	gene-meta
ENSMUSG00000008206	Cers4	LIPID-P-2096	Cer(d19:1/24:1)	SP	C00195	0.916339	0.010206	gene-meta
ENSMUSG00000071369	Map3k5	LIPID-P-2096	Cer(d19:1/24:1)	SP	C00195	0.840694	0.0360461	gene-meta
ENSMUSG00000022875	Kng1	LIPID-P-2096	Cer(d19:1/24:1)	SP	C00195	0.894471	0.0161171	gene-meta
ENSMUSG00000052889	Prkcb	LIPID-P-2096	Cer(d19:1/24:1)	SP	C00195	-0.854671	0.0301462	gene-meta
ENSMUSG00000032908	Sgpp2	LIPID-P-2096	Cer(d19:1/24:1)	SP	C00195	0.848612	0.0326426	gene-meta
ENSMUSG00000045092	S1pr1	LIPID-P-2086	Cer(d18:2/25:1)	SP	C00195	0.919335	0.00949788	gene-meta
ENSMUSG00000067586	S1pr3	LIPID-P-2086	Cer(d18:2/25:1)	SP	C00195	0.912825	0.0110679	gene-meta
ENSMUSG00000060459	Kng2	LIPID-P-2086	Cer(d18:2/25:1)	SP	C00195	0.84537	0.0340172	gene-meta
ENSMUSG00000061878	Sphk1	LIPID-P-2086	Cer(d18:2/25:1)	SP	C00195	0.900054	0.0144846	gene-meta
ENSMUSG00000021070	Bdkrb2	LIPID-P-2086	Cer(d18:2/25:1)	SP	C00195	0.90835	0.0122146	gene-meta
ENSMUSG00000051177	Plcb1	LIPID-P-2086	Cer(d18:2/25:1)	SP	C00195	0.901217	0.0141552	gene-meta
ENSMUSG00000008206	Cers4	LIPID-P-2086	Cer(d18:2/25:1)	SP	C00195	0.967971	0.00152232	gene-meta
ENSMUSG00000071369	Map3k5	LIPID-P-2086	Cer(d18:2/25:1)	SP	C00195	0.899318	0.0146949	gene-meta
ENSMUSG00000039936	Pik3cd	LIPID-P-2086	Cer(d18:2/25:1)	SP	C00195	0.881888	0.0201018	gene-meta
ENSMUSG00000022875	Kng1	LIPID-P-2086	Cer(d18:2/25:1)	SP	C00195	0.948277	0.00394369	gene-meta
ENSMUSG00000052889	Prkcb	LIPID-P-2086	Cer(d18:2/25:1)	SP	C00195	-0.883586	0.0195393	gene-meta
ENSMUSG00000032908	Sgpp2	LIPID-P-2086	Cer(d18:2/25:1)	SP	C00195	0.842541	0.0352381	gene-meta
ENSMUSG00000045092	S1pr1	LIPID-P-2083	Cer(d18:2/22:1)	SP	C00195	0.937788	0.00568507	gene-meta
ENSMUSG00000067586	S1pr3	LIPID-P-2083	Cer(d18:2/22:1)	SP	C00195	0.943282	0.0047341	gene-meta
ENSMUSG00000060459	Kng2	LIPID-P-2083	Cer(d18:2/22:1)	SP	C00195	0.896841	0.0154139	gene-meta
ENSMUSG00000061878	Sphk1	LIPID-P-2083	Cer(d18:2/22:1)	SP	C00195	0.947017	0.00413641	gene-meta
ENSMUSG00000021070	Bdkrb2	LIPID-P-2083	Cer(d18:2/22:1)	SP	C00195	0.959411	0.00243775	gene-meta
ENSMUSG00000051177	Plcb1	LIPID-P-2083	Cer(d18:2/22:1)	SP	C00195	0.923717	0.00850664	gene-meta
ENSMUSG00000008206	Cers4	LIPID-P-2083	Cer(d18:2/22:1)	SP	C00195	0.995176	3.48569e-05	gene-meta
ENSMUSG00000071369	Map3k5	LIPID-P-2083	Cer(d18:2/22:1)	SP	C00195	0.931579	0.006862	gene-meta
ENSMUSG00000039936	Pik3cd	LIPID-P-2083	Cer(d18:2/22:1)	SP	C00195	0.940846	0.00514526	gene-meta
ENSMUSG00000022875	Kng1	LIPID-P-2083	Cer(d18:2/22:1)	SP	C00195	0.975921	0.000862696	gene-meta
ENSMUSG00000052889	Prkcb	LIPID-P-2083	Cer(d18:2/22:1)	SP	C00195	-0.9066	0.0126779	gene-meta
ENSMUSG00000045092	S1pr1	LIPID-P-2076	Cer(d18:1/25:1)	SP	C00195	0.900856	0.0142571	gene-meta
ENSMUSG00000067586	S1pr3	LIPID-P-2076	Cer(d18:1/25:1)	SP	C00195	0.893846	0.0163049	gene-meta
ENSMUSG00000060459	Kng2	LIPID-P-2076	Cer(d18:1/25:1)	SP	C00195	0.827587	0.0420266	gene-meta
ENSMUSG00000061878	Sphk1	LIPID-P-2076	Cer(d18:1/25:1)	SP	C00195	0.876459	0.0219508	gene-meta
ENSMUSG00000021070	Bdkrb2	LIPID-P-2076	Cer(d18:1/25:1)	SP	C00195	0.873324	0.0230539	gene-meta
ENSMUSG00000051177	Plcb1	LIPID-P-2076	Cer(d18:1/25:1)	SP	C00195	0.884551	0.0192232	gene-meta
ENSMUSG00000008206	Cers4	LIPID-P-2076	Cer(d18:1/25:1)	SP	C00195	0.909041	0.0120339	gene-meta
ENSMUSG00000071369	Map3k5	LIPID-P-2076	Cer(d18:1/25:1)	SP	C00195	0.869362	0.0244845	gene-meta
ENSMUSG00000039936	Pik3cd	LIPID-P-2076	Cer(d18:1/25:1)	SP	C00195	0.828221	0.0417274	gene-meta
ENSMUSG00000022875	Kng1	LIPID-P-2076	Cer(d18:1/25:1)	SP	C00195	0.887427	0.0182958	gene-meta
ENSMUSG00000052889	Prkcb	LIPID-P-2076	Cer(d18:1/25:1)	SP	C00195	-0.847094	0.0332829	gene-meta
ENSMUSG00000032908	Sgpp2	LIPID-P-2076	Cer(d18:1/25:1)	SP	C00195	0.903997	0.0133823	gene-meta
ENSMUSG00000045092	S1pr1	LIPID-P-2084	Cer(d18:2/24:2)	SP	C00195	0.824852	0.0433289	gene-meta
ENSMUSG00000008206	Cers4	LIPID-P-2084	Cer(d18:2/24:2)	SP	C00195	0.885492	0.0189174	gene-meta
ENSMUSG00000022875	Kng1	LIPID-P-2084	Cer(d18:2/24:2)	SP	C00195	0.85495	0.0300334	gene-meta
ENSMUSG00000052889	Prkcb	LIPID-P-2084	Cer(d18:2/24:2)	SP	C00195	-0.843542	0.0348038	gene-meta
ENSMUSG00000045092	S1pr1	LIPID-P-2071	Cer(d18:1/15:0)	SP	C00195	0.899511	0.0146398	gene-meta
ENSMUSG00000067586	S1pr3	LIPID-P-2071	Cer(d18:1/15:0)	SP	C00195	0.892549	0.0166982	gene-meta
ENSMUSG00000060459	Kng2	LIPID-P-2071	Cer(d18:1/15:0)	SP	C00195	0.82131	0.0450425	gene-meta
ENSMUSG00000061878	Sphk1	LIPID-P-2071	Cer(d18:1/15:0)	SP	C00195	0.885974	0.0187615	gene-meta
ENSMUSG00000021070	Bdkrb2	LIPID-P-2071	Cer(d18:1/15:0)	SP	C00195	0.896638	0.0154734	gene-meta
ENSMUSG00000051177	Plcb1	LIPID-P-2071	Cer(d18:1/15:0)	SP	C00195	0.879427	0.0209303	gene-meta
ENSMUSG00000008206	Cers4	LIPID-P-2071	Cer(d18:1/15:0)	SP	C00195	0.969648	0.00136789	gene-meta
ENSMUSG00000071369	Map3k5	LIPID-P-2071	Cer(d18:1/15:0)	SP	C00195	0.881089	0.0203691	gene-meta
ENSMUSG00000039936	Pik3cd	LIPID-P-2071	Cer(d18:1/15:0)	SP	C00195	0.872961	0.0231831	gene-meta
ENSMUSG00000022875	Kng1	LIPID-P-2071	Cer(d18:1/15:0)	SP	C00195	0.950496	0.0036153	gene-meta
ENSMUSG00000052889	Prkcb	LIPID-P-2071	Cer(d18:1/15:0)	SP	C00195	-0.883155	0.0196815	gene-meta
ENSMUSG00000045092	S1pr1	LIPID-P-2074	Cer(d18:1/23:1)	SP	C00195	0.940459	0.0052122	gene-meta
ENSMUSG00000067586	S1pr3	LIPID-P-2074	Cer(d18:1/23:1)	SP	C00195	0.942672	0.00483562	gene-meta
ENSMUSG00000060459	Kng2	LIPID-P-2074	Cer(d18:1/23:1)	SP	C00195	0.88476	0.0191551	gene-meta
ENSMUSG00000061878	Sphk1	LIPID-P-2074	Cer(d18:1/23:1)	SP	C00195	0.952753	0.00329569	gene-meta
ENSMUSG00000021070	Bdkrb2	LIPID-P-2074	Cer(d18:1/23:1)	SP	C00195	0.950984	0.00354492	gene-meta
ENSMUSG00000051177	Plcb1	LIPID-P-2074	Cer(d18:1/23:1)	SP	C00195	0.923597	0.00853311	gene-meta
ENSMUSG00000008206	Cers4	LIPID-P-2074	Cer(d18:1/23:1)	SP	C00195	0.979027	0.000655201	gene-meta
ENSMUSG00000071369	Map3k5	LIPID-P-2074	Cer(d18:1/23:1)	SP	C00195	0.915242	0.0104714	gene-meta
ENSMUSG00000039936	Pik3cd	LIPID-P-2074	Cer(d18:1/23:1)	SP	C00195	0.899846	0.0145439	gene-meta
ENSMUSG00000022875	Kng1	LIPID-P-2074	Cer(d18:1/23:1)	SP	C00195	0.954037	0.00312031	gene-meta
ENSMUSG00000052889	Prkcb	LIPID-P-2074	Cer(d18:1/23:1)	SP	C00195	-0.922296	0.00882234	gene-meta
ENSMUSG00000032908	Sgpp2	LIPID-P-2074	Cer(d18:1/23:1)	SP	C00195	0.887674	0.018217	gene-meta
ENSMUSG00000045092	S1pr1	LIPID-P-0239	DG(16:0_20:4)	GL	C00165	0.938575	0.00554369	gene-meta
ENSMUSG00000067586	S1pr3	LIPID-P-0239	DG(16:0_20:4)	GL	C00165	0.953165	0.00323896	gene-meta
ENSMUSG00000060459	Kng2	LIPID-P-0239	DG(16:0_20:4)	GL	C00165	0.901878	0.0139695	gene-meta
ENSMUSG00000061878	Sphk1	LIPID-P-0239	DG(16:0_20:4)	GL	C00165	0.898812	0.0148405	gene-meta
ENSMUSG00000021070	Bdkrb2	LIPID-P-0239	DG(16:0_20:4)	GL	C00165	0.922675	0.00873759	gene-meta
ENSMUSG00000051177	Plcb1	LIPID-P-0239	DG(16:0_20:4)	GL	C00165	0.929056	0.00737111	gene-meta
ENSMUSG00000008206	Cers4	LIPID-P-0239	DG(16:0_20:4)	GL	C00165	0.973637	0.00103331	gene-meta
ENSMUSG00000071369	Map3k5	LIPID-P-0239	DG(16:0_20:4)	GL	C00165	0.95379	0.00315367	gene-meta
ENSMUSG00000039936	Pik3cd	LIPID-P-0239	DG(16:0_20:4)	GL	C00165	0.993555	6.21775e-05	gene-meta
ENSMUSG00000022875	Kng1	LIPID-P-0239	DG(16:0_20:4)	GL	C00165	0.990137	0.000145428	gene-meta
ENSMUSG00000032908	Sgpp2	LIPID-P-0239	DG(16:0_20:4)	GL	C00165	0.813791	0.0487824	gene-meta
ENSMUSG00000045092	S1pr1	LIPID-P-0192	DG(16:0_16:1)	GL	C00165	0.852582	0.0309961	gene-meta
ENSMUSG00000067586	S1pr3	LIPID-P-0192	DG(16:0_16:1)	GL	C00165	0.874688	0.0225707	gene-meta
ENSMUSG00000060459	Kng2	LIPID-P-0192	DG(16:0_16:1)	GL	C00165	0.850797	0.0317314	gene-meta
ENSMUSG00000051177	Plcb1	LIPID-P-0192	DG(16:0_16:1)	GL	C00165	0.85539	0.0298562	gene-meta
ENSMUSG00000008206	Cers4	LIPID-P-0192	DG(16:0_16:1)	GL	C00165	0.843969	0.0346191	gene-meta
ENSMUSG00000071369	Map3k5	LIPID-P-0192	DG(16:0_16:1)	GL	C00165	0.900626	0.014322	gene-meta
ENSMUSG00000039936	Pik3cd	LIPID-P-0192	DG(16:0_16:1)	GL	C00165	0.9628	0.00205002	gene-meta
ENSMUSG00000022875	Kng1	LIPID-P-0192	DG(16:0_16:1)	GL	C00165	0.886265	0.0186677	gene-meta
ENSMUSG00000067586	S1pr3	LIPID-P-0174	DG(16:0_18:0)	GL	C00165	0.820871	0.0452567	gene-meta
ENSMUSG00000060459	Kng2	LIPID-P-0174	DG(16:0_18:0)	GL	C00165	0.812217	0.0495827	gene-meta
ENSMUSG00000021070	Bdkrb2	LIPID-P-0174	DG(16:0_18:0)	GL	C00165	0.812836	0.0492676	gene-meta
ENSMUSG00000008206	Cers4	LIPID-P-0174	DG(16:0_18:0)	GL	C00165	0.841012	0.0359065	gene-meta
ENSMUSG00000071369	Map3k5	LIPID-P-0174	DG(16:0_18:0)	GL	C00165	0.845848	0.0338127	gene-meta
ENSMUSG00000039936	Pik3cd	LIPID-P-0174	DG(16:0_18:0)	GL	C00165	0.917038	0.0100386	gene-meta
ENSMUSG00000022875	Kng1	LIPID-P-0174	DG(16:0_18:0)	GL	C00165	0.859686	0.0281506	gene-meta
ENSMUSG00000045092	S1pr1	LIPID-P-0749	SM(d18:2/14:0)	SP	C00550	0.897957	0.0150878	gene-meta
ENSMUSG00000067586	S1pr3	LIPID-P-0749	SM(d18:2/14:0)	SP	C00550	0.905878	0.0128716	gene-meta
ENSMUSG00000060459	Kng2	LIPID-P-0749	SM(d18:2/14:0)	SP	C00550	0.89389	0.0162917	gene-meta
ENSMUSG00000061878	Sphk1	LIPID-P-0749	SM(d18:2/14:0)	SP	C00550	0.930877	0.00700183	gene-meta
ENSMUSG00000021070	Bdkrb2	LIPID-P-0749	SM(d18:2/14:0)	SP	C00550	0.902783	0.0137173	gene-meta
ENSMUSG00000051177	Plcb1	LIPID-P-0749	SM(d18:2/14:0)	SP	C00550	0.894589	0.0160817	gene-meta
ENSMUSG00000008206	Cers4	LIPID-P-0749	SM(d18:2/14:0)	SP	C00550	0.812897	0.0492364	gene-meta
ENSMUSG00000071369	Map3k5	LIPID-P-0749	SM(d18:2/14:0)	SP	C00550	0.854977	0.0300224	gene-meta
ENSMUSG00000052889	Prkcb	LIPID-P-0749	SM(d18:2/14:0)	SP	C00550	-0.854724	0.0301248	gene-meta
ENSMUSG00000032908	Sgpp2	LIPID-P-0749	SM(d18:2/14:0)	SP	C00550	0.993258	6.80379e-05	gene-meta
ENSMUSG00000045092	S1pr1	LIPID-P-0747	SM(d18:1/25:0)	SP	C00550	-0.965857	0.00172867	gene-meta
ENSMUSG00000067586	S1pr3	LIPID-P-0747	SM(d18:1/25:0)	SP	C00550	-0.956068	0.00285268	gene-meta
ENSMUSG00000060459	Kng2	LIPID-P-0747	SM(d18:1/25:0)	SP	C00550	-0.947776	0.00401986	gene-meta
ENSMUSG00000061878	Sphk1	LIPID-P-0747	SM(d18:1/25:0)	SP	C00550	-0.925073	0.00821078	gene-meta
ENSMUSG00000021070	Bdkrb2	LIPID-P-0747	SM(d18:1/25:0)	SP	C00550	-0.956663	0.00277646	gene-meta
ENSMUSG00000051177	Plcb1	LIPID-P-0747	SM(d18:1/25:0)	SP	C00550	-0.964032	0.00191723	gene-meta
ENSMUSG00000008206	Cers4	LIPID-P-0747	SM(d18:1/25:0)	SP	C00550	-0.961114	0.00223875	gene-meta
ENSMUSG00000071369	Map3k5	LIPID-P-0747	SM(d18:1/25:0)	SP	C00550	-0.976138	0.000847321	gene-meta
ENSMUSG00000039936	Pik3cd	LIPID-P-0747	SM(d18:1/25:0)	SP	C00550	-0.941454	0.00504118	gene-meta
ENSMUSG00000022875	Kng1	LIPID-P-0747	SM(d18:1/25:0)	SP	C00550	-0.924684	0.00829518	gene-meta
ENSMUSG00000052889	Prkcb	LIPID-P-0747	SM(d18:1/25:0)	SP	C00550	0.878866	0.0211215	gene-meta
ENSMUSG00000045092	S1pr1	LIPID-P-0732	SM(d18:0/18:0)	SP	C00550	0.946919	0.00415159	gene-meta
ENSMUSG00000067586	S1pr3	LIPID-P-0732	SM(d18:0/18:0)	SP	C00550	0.960776	0.00227755	gene-meta
ENSMUSG00000060459	Kng2	LIPID-P-0732	SM(d18:0/18:0)	SP	C00550	0.910865	0.0115634	gene-meta
ENSMUSG00000061878	Sphk1	LIPID-P-0732	SM(d18:0/18:0)	SP	C00550	0.970444	0.00129743	gene-meta
ENSMUSG00000021070	Bdkrb2	LIPID-P-0732	SM(d18:0/18:0)	SP	C00550	0.965211	0.00179439	gene-meta
ENSMUSG00000051177	Plcb1	LIPID-P-0732	SM(d18:0/18:0)	SP	C00550	0.933046	0.00657409	gene-meta
ENSMUSG00000008206	Cers4	LIPID-P-0732	SM(d18:0/18:0)	SP	C00550	0.972101	0.00115665	gene-meta
ENSMUSG00000071369	Map3k5	LIPID-P-0732	SM(d18:0/18:0)	SP	C00550	0.927002	0.00779858	gene-meta
ENSMUSG00000039936	Pik3cd	LIPID-P-0732	SM(d18:0/18:0)	SP	C00550	0.928483	0.00748922	gene-meta
ENSMUSG00000022875	Kng1	LIPID-P-0732	SM(d18:0/18:0)	SP	C00550	0.956461	0.00280223	gene-meta
ENSMUSG00000052889	Prkcb	LIPID-P-0732	SM(d18:0/18:0)	SP	C00550	-0.900729	0.014293	gene-meta
ENSMUSG00000032908	Sgpp2	LIPID-P-0732	SM(d18:0/18:0)	SP	C00550	0.909808	0.0118351	gene-meta
ENSMUSG00000045092	S1pr1	LIPID-P-0730	SM(d18:0/16:0)	SP	C00550	0.981217	0.000525885	gene-meta
ENSMUSG00000067586	S1pr3	LIPID-P-0730	SM(d18:0/16:0)	SP	C00550	0.983588	0.000401812	gene-meta
ENSMUSG00000060459	Kng2	LIPID-P-0730	SM(d18:0/16:0)	SP	C00550	0.95922	0.00246057	gene-meta
ENSMUSG00000061878	Sphk1	LIPID-P-0730	SM(d18:0/16:0)	SP	C00550	0.982841	0.000439105	gene-meta
ENSMUSG00000021070	Bdkrb2	LIPID-P-0730	SM(d18:0/16:0)	SP	C00550	0.992939	7.46155e-05	gene-meta
ENSMUSG00000051177	Plcb1	LIPID-P-0730	SM(d18:0/16:0)	SP	C00550	0.97384	0.00101759	gene-meta
ENSMUSG00000008206	Cers4	LIPID-P-0730	SM(d18:0/16:0)	SP	C00550	0.985813	0.00030049	gene-meta
ENSMUSG00000071369	Map3k5	LIPID-P-0730	SM(d18:0/16:0)	SP	C00550	0.972936	0.00108881	gene-meta
ENSMUSG00000039936	Pik3cd	LIPID-P-0730	SM(d18:0/16:0)	SP	C00550	0.949295	0.00379131	gene-meta
ENSMUSG00000022875	Kng1	LIPID-P-0730	SM(d18:0/16:0)	SP	C00550	0.952776	0.00329244	gene-meta
ENSMUSG00000052889	Prkcb	LIPID-P-0730	SM(d18:0/16:0)	SP	C00550	-0.92748	0.00769797	gene-meta
ENSMUSG00000032908	Sgpp2	LIPID-P-0730	SM(d18:0/16:0)	SP	C00550	0.873392	0.0230298	gene-meta
ENSMUSG00000045092	S1pr1	LIPID-P-0729	SM(d18:0/14:0)	SP	C00550	0.976782	0.000802353	gene-meta
ENSMUSG00000067586	S1pr3	LIPID-P-0729	SM(d18:0/14:0)	SP	C00550	0.976901	0.000794165	gene-meta
ENSMUSG00000060459	Kng2	LIPID-P-0729	SM(d18:0/14:0)	SP	C00550	0.947481	0.00406497	gene-meta
ENSMUSG00000061878	Sphk1	LIPID-P-0729	SM(d18:0/14:0)	SP	C00550	0.971984	0.00116631	gene-meta
ENSMUSG00000021070	Bdkrb2	LIPID-P-0729	SM(d18:0/14:0)	SP	C00550	0.967688	0.00154922	gene-meta
ENSMUSG00000051177	Plcb1	LIPID-P-0729	SM(d18:0/14:0)	SP	C00550	0.96963	0.00136948	gene-meta
ENSMUSG00000008206	Cers4	LIPID-P-0729	SM(d18:0/14:0)	SP	C00550	0.940141	0.00526734	gene-meta
ENSMUSG00000071369	Map3k5	LIPID-P-0729	SM(d18:0/14:0)	SP	C00550	0.951635	0.00345223	gene-meta
ENSMUSG00000039936	Pik3cd	LIPID-P-0729	SM(d18:0/14:0)	SP	C00550	0.898059	0.0150584	gene-meta
ENSMUSG00000022875	Kng1	LIPID-P-0729	SM(d18:0/14:0)	SP	C00550	0.903894	0.0134107	gene-meta
ENSMUSG00000052889	Prkcb	LIPID-P-0729	SM(d18:0/14:0)	SP	C00550	-0.90896	0.0120552	gene-meta
ENSMUSG00000032908	Sgpp2	LIPID-P-0729	SM(d18:0/14:0)	SP	C00550	0.966451	0.0016694	gene-meta
ENSMUSG00000045092	S1pr1	LIPID-P-0728	SM(d18:0/13:0)	SP	C00550	0.837524	0.0374533	gene-meta
ENSMUSG00000067586	S1pr3	LIPID-P-0728	SM(d18:0/13:0)	SP	C00550	0.826254	0.0426589	gene-meta
ENSMUSG00000061878	Sphk1	LIPID-P-0728	SM(d18:0/13:0)	SP	C00550	0.85981	0.0281021	gene-meta
ENSMUSG00000021070	Bdkrb2	LIPID-P-0728	SM(d18:0/13:0)	SP	C00550	0.82903	0.0413473	gene-meta
ENSMUSG00000051177	Plcb1	LIPID-P-0728	SM(d18:0/13:0)	SP	C00550	0.827592	0.0420246	gene-meta
ENSMUSG00000052889	Prkcb	LIPID-P-0728	SM(d18:0/13:0)	SP	C00550	-0.856469	0.0294231	gene-meta
ENSMUSG00000032908	Sgpp2	LIPID-P-0728	SM(d18:0/13:0)	SP	C00550	0.949218	0.00380272	gene-meta
ENSMUSG00000045092	S1pr1	LIPID-P-0727	SM(d18:0/12:0)	SP	C00550	0.970417	0.0012998	gene-meta
ENSMUSG00000067586	S1pr3	LIPID-P-0727	SM(d18:0/12:0)	SP	C00550	0.977984	0.0007217	gene-meta
ENSMUSG00000060459	Kng2	LIPID-P-0727	SM(d18:0/12:0)	SP	C00550	0.937584	0.00572201	gene-meta
ENSMUSG00000061878	Sphk1	LIPID-P-0727	SM(d18:0/12:0)	SP	C00550	0.96963	0.0013695	gene-meta
ENSMUSG00000021070	Bdkrb2	LIPID-P-0727	SM(d18:0/12:0)	SP	C00550	0.965819	0.00173259	gene-meta
ENSMUSG00000051177	Plcb1	LIPID-P-0727	SM(d18:0/12:0)	SP	C00550	0.96085	0.00226911	gene-meta
ENSMUSG00000008206	Cers4	LIPID-P-0727	SM(d18:0/12:0)	SP	C00550	0.955345	0.00294652	gene-meta
ENSMUSG00000071369	Map3k5	LIPID-P-0727	SM(d18:0/12:0)	SP	C00550	0.949748	0.00372441	gene-meta
ENSMUSG00000039936	Pik3cd	LIPID-P-0727	SM(d18:0/12:0)	SP	C00550	0.923646	0.00852238	gene-meta
ENSMUSG00000022875	Kng1	LIPID-P-0727	SM(d18:0/12:0)	SP	C00550	0.933884	0.0064124	gene-meta
ENSMUSG00000052889	Prkcb	LIPID-P-0727	SM(d18:0/12:0)	SP	C00550	-0.890724	0.0172595	gene-meta
ENSMUSG00000032908	Sgpp2	LIPID-P-0727	SM(d18:0/12:0)	SP	C00550	0.955853	0.00288041	gene-meta
ENSMUSG00000045092	S1pr1	LIPID-P-0736	SM(d18:1/14:0)	SP	C00550	0.854831	0.0300815	gene-meta
ENSMUSG00000067586	S1pr3	LIPID-P-0736	SM(d18:1/14:0)	SP	C00550	0.86615	0.0256747	gene-meta
ENSMUSG00000061878	Sphk1	LIPID-P-0736	SM(d18:1/14:0)	SP	C00550	0.871898	0.0235642	gene-meta
ENSMUSG00000021070	Bdkrb2	LIPID-P-0736	SM(d18:1/14:0)	SP	C00550	0.846101	0.0337048	gene-meta
ENSMUSG00000051177	Plcb1	LIPID-P-0736	SM(d18:1/14:0)	SP	C00550	0.838499	0.0370177	gene-meta
ENSMUSG00000008206	Cers4	LIPID-P-0736	SM(d18:1/14:0)	SP	C00550	0.844568	0.0343612	gene-meta
ENSMUSG00000071369	Map3k5	LIPID-P-0736	SM(d18:1/14:0)	SP	C00550	0.811424	0.0499881	gene-meta
ENSMUSG00000022875	Kng1	LIPID-P-0736	SM(d18:1/14:0)	SP	C00550	0.832414	0.0397744	gene-meta
ENSMUSG00000032908	Sgpp2	LIPID-P-0736	SM(d18:1/14:0)	SP	C00550	0.95562	0.00291073	gene-meta
ENSMUSG00000067586	S1pr3	LIPID-P-0763	SM(d18:2/22:1)	SP	C00550	0.83201	0.0399606	gene-meta
ENSMUSG00000061878	Sphk1	LIPID-P-0763	SM(d18:2/22:1)	SP	C00550	0.827899	0.0418795	gene-meta
ENSMUSG00000021070	Bdkrb2	LIPID-P-0763	SM(d18:2/22:1)	SP	C00550	0.848125	0.0328474	gene-meta
ENSMUSG00000008206	Cers4	LIPID-P-0763	SM(d18:2/22:1)	SP	C00550	0.903429	0.0135386	gene-meta
ENSMUSG00000071369	Map3k5	LIPID-P-0763	SM(d18:2/22:1)	SP	C00550	0.824152	0.0436652	gene-meta
ENSMUSG00000039936	Pik3cd	LIPID-P-0763	SM(d18:2/22:1)	SP	C00550	0.912906	0.0110477	gene-meta
ENSMUSG00000022875	Kng1	LIPID-P-0763	SM(d18:2/22:1)	SP	C00550	0.922567	0.00876176	gene-meta
ENSMUSG00000045092	S1pr1	LIPID-P-0735	SM(d18:1/12:0)	SP	C00550	0.942283	0.00490072	gene-meta
ENSMUSG00000067586	S1pr3	LIPID-P-0735	SM(d18:1/12:0)	SP	C00550	0.943384	0.00471727	gene-meta
ENSMUSG00000060459	Kng2	LIPID-P-0735	SM(d18:1/12:0)	SP	C00550	0.924007	0.0084429	gene-meta
ENSMUSG00000061878	Sphk1	LIPID-P-0735	SM(d18:1/12:0)	SP	C00550	0.937895	0.00566579	gene-meta
ENSMUSG00000021070	Bdkrb2	LIPID-P-0735	SM(d18:1/12:0)	SP	C00550	0.924049	0.00843372	gene-meta
ENSMUSG00000051177	Plcb1	LIPID-P-0735	SM(d18:1/12:0)	SP	C00550	0.938829	0.00549846	gene-meta
ENSMUSG00000008206	Cers4	LIPID-P-0735	SM(d18:1/12:0)	SP	C00550	0.864136	0.0264344	gene-meta
ENSMUSG00000071369	Map3k5	LIPID-P-0735	SM(d18:1/12:0)	SP	C00550	0.909814	0.0118336	gene-meta
ENSMUSG00000039936	Pik3cd	LIPID-P-0735	SM(d18:1/12:0)	SP	C00550	0.835632	0.038305	gene-meta
ENSMUSG00000022875	Kng1	LIPID-P-0735	SM(d18:1/12:0)	SP	C00550	0.82416	0.0436609	gene-meta
ENSMUSG00000052889	Prkcb	LIPID-P-0735	SM(d18:1/12:0)	SP	C00550	-0.859987	0.0280331	gene-meta
ENSMUSG00000032908	Sgpp2	LIPID-P-0735	SM(d18:1/12:0)	SP	C00550	0.995075	3.63187e-05	gene-meta
ENSMUSG00000045092	S1pr1	LIPID-P-1279	SPH(d17:1)	SP	C00836	0.83067	0.0405815	gene-meta
ENSMUSG00000067586	S1pr3	LIPID-P-1279	SPH(d17:1)	SP	C00836	0.835436	0.0383939	gene-meta
ENSMUSG00000061878	Sphk1	LIPID-P-1279	SPH(d17:1)	SP	C00836	0.816079	0.0476295	gene-meta
ENSMUSG00000021070	Bdkrb2	LIPID-P-1279	SPH(d17:1)	SP	C00836	0.854046	0.0303994	gene-meta
ENSMUSG00000051177	Plcb1	LIPID-P-1279	SPH(d17:1)	SP	C00836	0.819851	0.0457574	gene-meta
ENSMUSG00000008206	Cers4	LIPID-P-1279	SPH(d17:1)	SP	C00836	0.924726	0.00828591	gene-meta
ENSMUSG00000071369	Map3k5	LIPID-P-1279	SPH(d17:1)	SP	C00836	0.855465	0.029826	gene-meta
ENSMUSG00000039936	Pik3cd	LIPID-P-1279	SPH(d17:1)	SP	C00836	0.903175	0.0136088	gene-meta
ENSMUSG00000022875	Kng1	LIPID-P-1279	SPH(d17:1)	SP	C00836	0.921124	0.00908666	gene-meta
ENSMUSG00000045092	S1pr1	LIPID-P-0094	SPH(d18:0)	SP	C00836	0.98307	0.000427489	gene-meta
ENSMUSG00000067586	S1pr3	LIPID-P-0094	SPH(d18:0)	SP	C00836	0.986185	0.000284972	gene-meta
ENSMUSG00000060459	Kng2	LIPID-P-0094	SPH(d18:0)	SP	C00836	0.971738	0.00118685	gene-meta
ENSMUSG00000061878	Sphk1	LIPID-P-0094	SPH(d18:0)	SP	C00836	0.983759	0.000393532	gene-meta
ENSMUSG00000021070	Bdkrb2	LIPID-P-0094	SPH(d18:0)	SP	C00836	0.995246	3.38461e-05	gene-meta
ENSMUSG00000051177	Plcb1	LIPID-P-0094	SPH(d18:0)	SP	C00836	0.978534	0.000686238	gene-meta
ENSMUSG00000008206	Cers4	LIPID-P-0094	SPH(d18:0)	SP	C00836	0.974559	0.000962663	gene-meta
ENSMUSG00000071369	Map3k5	LIPID-P-0094	SPH(d18:0)	SP	C00836	0.978138	0.000711696	gene-meta
ENSMUSG00000039936	Pik3cd	LIPID-P-0094	SPH(d18:0)	SP	C00836	0.951035	0.00353767	gene-meta
ENSMUSG00000022875	Kng1	LIPID-P-0094	SPH(d18:0)	SP	C00836	0.939332	0.00540931	gene-meta
ENSMUSG00000052889	Prkcb	LIPID-P-0094	SPH(d18:0)	SP	C00836	-0.919776	0.0093957	gene-meta
ENSMUSG00000032908	Sgpp2	LIPID-P-0094	SPH(d18:0)	SP	C00836	0.869967	0.0242635	gene-meta
ENSMUSG00000045092	S1pr1	LIPID-P-0097	SPH(d18:2)	SP	C00836	0.970012	0.00133545	gene-meta
ENSMUSG00000067586	S1pr3	LIPID-P-0097	SPH(d18:2)	SP	C00836	0.967378	0.00157893	gene-meta
ENSMUSG00000060459	Kng2	LIPID-P-0097	SPH(d18:2)	SP	C00836	0.960293	0.00233371	gene-meta
ENSMUSG00000061878	Sphk1	LIPID-P-0097	SPH(d18:2)	SP	C00836	0.947527	0.00405782	gene-meta
ENSMUSG00000021070	Bdkrb2	LIPID-P-0097	SPH(d18:2)	SP	C00836	0.973199	0.00106778	gene-meta
ENSMUSG00000051177	Plcb1	LIPID-P-0097	SPH(d18:2)	SP	C00836	0.96804	0.00151583	gene-meta
ENSMUSG00000008206	Cers4	LIPID-P-0097	SPH(d18:2)	SP	C00836	0.965823	0.00173218	gene-meta
ENSMUSG00000071369	Map3k5	LIPID-P-0097	SPH(d18:2)	SP	C00836	0.978335	0.000698982	gene-meta
ENSMUSG00000039936	Pik3cd	LIPID-P-0097	SPH(d18:2)	SP	C00836	0.953152	0.00324076	gene-meta
ENSMUSG00000022875	Kng1	LIPID-P-0097	SPH(d18:2)	SP	C00836	0.931616	0.00685459	gene-meta
ENSMUSG00000052889	Prkcb	LIPID-P-0097	SPH(d18:2)	SP	C00836	-0.888504	0.017954	gene-meta
Lipids were categorized into eight major classes (Class I) containing 48,548 unique lipid structures according to the LIPID MAPS® Structure Database (LMSD) (https://lipidmaps.org/databases/lmsd/overview).

## Sheet: Table SV
Table SV. Energy metabolism specific information for differential expression.
Compounds	Class	VIP	P-value	FDR	Log2FC	Type
Glucuronic-acid	Carbohydrate metabolomics	1.34959	0.015629	0.0613998	1.79168	up
Acetyl-CoA	CoEnzyme and vitamins	1.07323	0.0618749	0.162053	1.33277	up
Guanosine	Nucleotide and Its metabolomics	1.40862	0.00658706	0.0329353	-2.26164	down
UMP	Nucleotide and Its metabolomics	1.10732	0.0506708	0.143707	1.79168	up
dCMP	Nucleotide and Its metabolomics	1.46755	0.00622468	0.0329353	-2.56644	down
dAMP	Nucleotide and Its metabolomics	1.45769	0.0047497	0.0326542	1.79168	up
IMP	Nucleotide and Its metabolomics	1.01486	0.0745921	0.18648	1.79168	up
Adenine	Nucleotide and Its metabolomics	1.35779	0.00563487	0.0329353	-2.29133	down
cis-Aconitic-acid	Organic acid And Its derivatives	1.68957	5.96e-06	0.000328	-2.56644	down
Itaconic-acid	Organic acid And Its derivatives	1.61305	0.000284	0.00390997	-2.12435	down
Citric-acid	Organic acid And Its derivatives	1.53536	0.0016336	0.0149746	-1.34288	down
VIP, Variable Importance in Projection

## Sheet: Table SVI
Table SVI. Lipid metabolism specific information for differential expression.
Compounds	Class I	Class II	VIP	P-value	FDR	Log2FC	Type
BMP(22:6_22:6)	GP	BMP	1.12736	0.0288545	0.0974149	-0.704814	down
BMP(18:1_22:5)	GP	BMP	1.10101	0.0430306	0.122596	-0.675697	down
Carnitine C22:1	FA	CAR	1.13315	0.021959	0.083368	-0.4969	down
Carnitine C20:0	FA	CAR	1.60412	5.4e-05	0.00456508	-0.948326	down
CE(22:6)	ST	CE	1.509	0.000766	0.0161453	-1.49005	down
CE(20:4)	ST	CE	1.62169	0.000332	0.0114561	-2.23604	down
CE(20:5)	ST	CE	1.49047	0.00274656	0.0280858	-2.04761	down
CE(20:3)	ST	CE	1.66634	2.81e-05	0.00297129	-1.7136	down
CE(20:2)	ST	CE	1.11915	0.0464885	0.128146	-1.19723	down
CE(18:2)	ST	CE	1.58198	0.000995	0.0180309	-1.93275	down
CE(18:1)	ST	CE	1.46832	0.0044346	0.0365135	-1.78466	down
CE(17:1)	ST	CE	1.55019	0.000594	0.0153721	-1.97376	down
CE(16:1)	ST	CE	1.46512	0.00274638	0.0280858	-1.96811	down
CE(16:0)	ST	CE	1.44643	0.00555686	0.0421922	-1.76273	down
Cer(d18:0/24:0(2OH))	SP	Cer-ADS	1.55197	0.0010237	0.0182824	-1.57357	down
Cer(t18:0/16:0(2OH))	SP	Cer-AP	1.12939	0.0352107	0.109025	-0.341168	down
Cer(t30:0/18:1(2OH))	SP	Cer-AP	1.21376	0.0242219	0.0888316	-0.988109	down
Cer(t18:0/26:1(2OH))	SP	Cer-AP	1.16136	0.0237047	0.0876315	-0.843324	down
Cer(d18:1/25:1(2OH))	SP	Cer-AS	1.41951	0.00393674	0.0343898	-0.940212	down
Cer(d17:1/16:2(2OH))	SP	Cer-AS	1.13248	0.042949	0.122596	-1.08235	down
Cer(d18:1/16:0(2OH))	SP	Cer-AS	1.26199	0.00981702	0.0515703	-0.497743	down
Cer(d18:1/21:0(2OH))	SP	Cer-AS	1.43791	0.00194684	0.0247833	-1.63658	down
Cer(d18:1/26:2(2OH))	SP	Cer-AS	1.1827	0.0188084	0.0757113	-0.67868	down
Cer(d18:2/21:1(2OH))	SP	Cer-AS	1.39391	0.00399824	0.0343898	-1.40019	down
Cer(d17:1/16:0(2OH))	SP	Cer-AS	1.07283	0.0459045	0.127089	-0.493735	down
Cer(d18:0/22:0)	SP	Cer-NDS	1.46731	0.000952	0.0176489	-1.41148	down
Cer(t18:0/26:0)	SP	Cer-NP	1.25639	0.0114128	0.0560718	-1.27618	down
Cer(t16:1/25:1)	SP	Cer-NP	1.12799	0.0423709	0.122079	-0.388383	down
Cer(t16:1/26:0)	SP	Cer-NP	1.43771	0.00164611	0.0238098	-1.30501	down
Cer(t17:2/16:0)	SP	Cer-NP	1.20522	0.0169282	0.0722725	-0.544713	down
Cer(t17:2/24:0)	SP	Cer-NP	1.07213	0.0424581	0.122079	-0.379277	down
Cer(t24:0/18:0)	SP	Cer-NP	1.40833	0.01039	0.0535548	-2.72286	down
Cer(t24:0/18:1)	SP	Cer-NP	1.34199	0.0031587	0.0306605	-1.69238	down
Cer(t18:1/24:0)	SP	Cer-NP	1.08719	0.0309497	0.099839	-0.969754	down
Cer(d17:1/16:0)	SP	Cer-NS	1.12585	0.0352792	0.109025	-0.544875	down
Cer(d16:1/26:1)	SP	Cer-NS	1.30814	0.00806976	0.0483566	-1.0697	down
Cer(d18:2/24:1)	SP	Cer-NS	1.04004	0.043642	0.123799	-0.894791	down
Cer(d18:2/24:0)	SP	Cer-NS	1.15392	0.0219827	0.083368	-0.978133	down
Cer(d18:2/22:0)	SP	Cer-NS	1.38205	0.00304538	0.0299344	-1.37908	down
Cer(d18:1/21:0)	SP	Cer-NS	1.29324	0.0085984	0.0488134	-0.809006	down
Cer(d18:2/18:0)	SP	Cer-NS	1.23644	0.010603	0.0536668	-0.54709	down
Cer(d18:1/26:1)	SP	Cer-NS	1.26758	0.00842874	0.0488134	-1.52714	down
Cer(d18:1/24:1)	SP	Cer-NS	1.30951	0.00677854	0.0462107	-1.06762	down
Cer(d18:1/22:1)	SP	Cer-NS	1.5673	0.000564	0.0149018	-1.86327	down
Cer(d18:1/26:0)	SP	Cer-NS	1.35019	0.00416055	0.0347077	-1.46749	down
Cer(d18:2/20:0)	SP	Cer-NS	1.43838	0.00129207	0.0204794	-1.15303	down
Cer(d18:1/23:0)	SP	Cer-NS	1.40517	0.00200819	0.0247833	-1.20447	down
Cer(d18:1/22:0)	SP	Cer-NS	1.59277	9.49e-05	0.00576796	-1.69069	down
Cer(d17:1/18:0)	SP	Cer-NS	1.2763	0.012713	0.0590482	-0.726111	down
Cer(d18:1/20:0)	SP	Cer-NS	1.52342	0.000401	0.0115568	-1.44324	down
Cer(d18:1/18:0)	SP	Cer-NS	1.41538	0.0019221	0.0247833	-0.936141	down
Cer(d18:1/17:0)	SP	Cer-NS	1.20593	0.0162546	0.0705852	-0.708507	down
Cer(d18:1/16:0)	SP	Cer-NS	1.29727	0.00790011	0.0479299	-0.944004	down
Cer(d18:1/14:0)	SP	Cer-NS	1.45433	0.00378237	0.0337749	-1.12478	down
Cer(d18:1/24:0)	SP	Cer-NS	1.23936	0.0170328	0.0723591	-1.11617	down
Cer(d17:1/24:1)	SP	Cer-NS	1.04883	0.045531	0.126331	-0.61108	down
Cer(d18:2/26:1)	SP	Cer-NS	1.23824	0.0126186	0.0588249	-1.18798	down
Cer(d19:1/24:1)	SP	Cer-NS	1.16242	0.0221474	0.0835801	-0.841503	down
Cer(d18:2/25:1)	SP	Cer-NS	1.26676	0.00789916	0.0479299	-1.14433	down
Cer(d18:2/22:1)	SP	Cer-NS	1.4774	0.000652	0.0157487	-1.5588	down
Cer(d18:1/25:1)	SP	Cer-NS	1.42523	0.00167098	0.0238098	-1.44783	down
Cer(d18:2/24:2)	SP	Cer-NS	1.18439	0.0294507	0.0974149	-1.16738	down
Cer(d18:1/15:0)	SP	Cer-NS	1.47491	0.00294437	0.0296306	-1.42379	down
Cer(d18:1/23:1)	SP	Cer-NS	1.49396	0.00085	0.0170359	-1.31875	down
DG(18:1_22:5)	GL	DG	1.10785	0.0403915	0.118192	-1.03979	down
DG(16:0_20:3)	GL	DG	1.16182	0.0370263	0.1123	-0.897074	down
DG(18:0_20:5)	GL	DG	1.179	0.0184061	0.0751659	-0.77006	down
DG(18:1_18:2)	GL	DG	1.11776	0.0474134	0.129849	-0.814839	down
DG(16:0_20:4)	GL	DG	1.30071	0.0140587	0.063016	-1.4501	down
DG(18:2_18:2)	GL	DG	1.1676	0.0351316	0.109025	-0.628438	down
DG(18:1_20:5)	GL	DG	1.46529	0.00217953	0.0258162	-1.29375	down
DG(18:1_20:3)	GL	DG	1.11188	0.0355623	0.109449	-0.77454	down
DG(16:0_20:5)	GL	DG	1.33067	0.00982683	0.0515703	-1.1775	down
DG(18:1_20:4)	GL	DG	1.15322	0.0337851	0.106302	-1.13981	down
DG(14:0_16:0)	GL	DG	1.14647	0.0383139	0.114851	-0.798766	down
DG(16:0_16:1)	GL	DG	1.15666	0.0350624	0.109025	-0.762555	down
DG(16:0_20:0)	GL	DG	1.24206	0.0117107	0.0560718	-0.749092	down
DG(16:0_18:0)	GL	DG	1.15044	0.0343984	0.107697	-0.598908	down
DG(O-19:2_20:0)	GL	DG-O	1.45913	0.00258801	0.0275764	-1.65721	down
9,10-EpOME	FA	Eicosanoid	1.20969	0.0165838	0.0710412	-0.864586	down
(±)15-HETE	FA	Eicosanoid	1.09434	0.0371085	0.1123	-0.442309	down
11(S)-HETE	FA	Eicosanoid	1.30856	0.00829893	0.0487737	-0.47324	down
FFA(17:1)	FA	FFA	1.29454	0.0173287	0.0727577	-1.15693	down
FFA(22:6)	FA	FFA	1.29859	0.0102573	0.0530869	-0.714697	down
FFA(20:5)	FA	FFA	1.2664	0.0154724	0.0678255	-0.852723	down
FFA(22:4)	FA	FFA	1.08589	0.0489246	0.132556	-0.832651	down
FFA(20:4)	FA	FFA	1.25409	0.0110545	0.0549691	-0.744048	down
Hex2Cer(d18:1/16:0)	SP	Hex2Cer	1.188	0.0370916	0.1123	-0.815496	down
Hex3Cer(d18:1/24:0)	SP	Hex3Cer	1.38296	0.00529706	0.0410361	-1.09467	down
HexCer(t17:2/16:0(2OH))	SP	HexCer-AP	1.40155	0.00676023	0.0462107	-1.00798	down
HexCer(d18:1/23:1)	SP	HexCer-NS	1.60202	0.000192	0.00872442	-1.72327	down
HexCer(d18:1/25:1)	SP	HexCer-NS	1.5294	0.00107174	0.018616	-2.04721	down
HexCer(d18:1/14:0)	SP	HexCer-NS	1.55484	0.000181	0.00851337	-1.1418	down
HexCer(d16:1/24:1)	SP	HexCer-NS	1.16997	0.0372252	0.112385	-1.17726	down
HexCer(d18:1/22:1)	SP	HexCer-NS	1.70603	5.59e-06	0.0012399	-2.17027	down
HexCer(d18:1/24:1)	SP	HexCer-NS	1.52733	0.000351	0.0114561	-1.42564	down
HexCer(d18:1/20:0)	SP	HexCer-NS	1.46552	0.00133648	0.0205651	-1.1338	down
HexCer(d18:1/22:0)	SP	HexCer-NS	1.26791	0.00929265	0.0507892	-0.70627	down
HexCer(d18:1/16:0)	SP	HexCer-NS	1.28868	0.0115848	0.0560718	-0.620668	down
HexCer(d18:1/18:0)	SP	HexCer-NS	1.36065	0.00575775	0.0426949	-0.872503	down
LNAPE(22:6/N-20:1)	GP	LNAPE	1.19035	0.0251634	0.0903499	-0.855086	down
LNAPE(20:4/N-18:2)	GP	LNAPE	1.24744	0.021424	0.0825703	-1.12968	down
LNAPE(18:2/N-18:2)	GP	LNAPE	1.42834	0.00460875	0.0374608	-0.680117	down
LNAPE(16:0/N-18:1)	GP	LNAPE	1.24406	0.0204076	0.079377	-0.75732	down
LNAPE(22:6/N-18:2)	GP	LNAPE	1.16201	0.0283336	0.0965779	-0.739753	down
LNAPE(16:1/N-16:0)	GP	LNAPE	1.38129	0.0086437	0.0488134	-1.09672	down
LPC(20:3)	GP	LPC	1.54972	0.000276	0.0102969	-0.58288	down
LPC(16:1)	GP	LPC	1.31785	0.0129419	0.0594577	-0.395285	down
LPC(19:1)	GP	LPC	1.37223	0.0106233	0.0536668	-0.301988	down
LPC(0:0/22:1)	GP	LPC	1.05988	0.0416392	0.12082	0.635452	up
LPC(18:3)	GP	LPC	1.17283	0.0208732	0.0806925	-0.553696	down
LPC(20:4)	GP	LPC	1.54069	0.000362	0.0114561	-0.835662	down
LPC(20:5)	GP	LPC	1.70066	7.51e-06	0.0012399	-0.85345	down
LPC(22:5/0:0)	GP	LPC	1.68887	0.0001	0.00576796	-1.1097	down
LPC(20:0/0:0)	GP	LPC	1.33515	0.00742497	0.0475498	-0.416297	down
LPC(0:0/19:0)	GP	LPC	1.57265	0.000122	0.00617313	-0.725927	down
LPC(18:0/0:0)	GP	LPC	1.6042	0.00022	0.00895776	-0.583758	down
LPC(0:0/18:0)	GP	LPC	1.42157	0.00527237	0.0410361	-0.870088	down
LPC(17:0/0:0)	GP	LPC	1.63243	9.11e-05	0.00576796	-0.655184	down
LPC(0:0/17:0)	GP	LPC	1.56484	0.00024	0.00922308	-0.642434	down
LPC(14:0)	GP	LPC	1.2133	0.0196195	0.0775	-0.385387	down
LPC(16:0/0:0)	GP	LPC	1.26173	0.0160808	0.0700702	-0.491038	down
LPC(15:0/0:0)	GP	LPC	1.55098	0.000908	0.0171893	-0.797282	down
LPC(0:0/15:0)	GP	LPC	1.62019	0.000118	0.00617313	-0.754602	down
LPC(24:2)	GP	LPC	1.03813	0.0422104	0.12192	0.662052	up
LPC(19:0/0:0)	GP	LPC	1.55752	0.000873	0.0170359	-0.933571	down
LPC(O-22:0)	GP	LPC-O	1.55211	0.000217	0.00895776	-0.813428	down
LPC(O-20:0)	GP	LPC-O	1.47487	0.00175484	0.0241026	-0.737728	down
LPC(O-14:0)	GP	LPC-O	1.37285	0.0064731	0.0446081	-0.532731	down
LPE(16:1)	GP	LPE	1.31676	0.00834691	0.0487737	-0.442712	down
LPE(18:1/0:0)	GP	LPE	1.14357	0.0276988	0.0951818	-0.322288	down
LPE(20:3/0:0)	GP	LPE	1.30035	0.0111892	0.0554216	-0.371257	down
LPE(24:0)	GP	LPE	1.3887	0.00223531	0.0258162	0.58943	up
LPE(18:0/0:0)	GP	LPE	1.32418	0.00643492	0.0445873	-0.561025	down
LPE(17:0)	GP	LPE	1.4759	0.00192121	0.0247833	-0.837795	down
LPE(16:0/0:0)	GP	LPE	1.70801	3.41e-06	0.0010905	-1.05258	down
LPE(P-18:1)	GP	LPE-P	1.17483	0.0401145	0.118192	-0.6576	down
LPG(16:0)	GP	LPG	1.24475	0.0117475	0.0560718	-0.37798	down
LPG(16:1)	GP	LPG	1.22071	0.0293486	0.0974149	-0.861077	down
LPG(18:2)	GP	LPG	1.12377	0.0441872	0.124766	-0.604937	down
LPI(20:3)	GP	LPI	1.29692	0.0069698	0.0464585	1.30287	up
LPS(22:6)	GP	LPS	1.55821	0.000399	0.0115568	-1.12619	down
LPS(18:1)	GP	LPS	1.0794	0.0487498	0.132366	-0.464096	down
LPS(18:0)	GP	LPS	1.13714	0.0207105	0.0803086	-0.419024	down
MG(20:3)	GL	MG	1.17877	0.0295529	0.0974149	-0.839651	down
MG(18:1)	GL	MG	1.6496	7.34e-05	0.00526083	-1.77687	down
MGDG(16:0_16:0)	GL	MGDG	1.39312	0.00366046	0.033301	-0.80973	down
MGDG(14:0_18:0)	GL	MGDG	1.36282	0.00296774	0.0296307	-0.992177	down
MGDG(16:0_18:1)	GL	MGDG	1.22867	0.0120041	0.0563747	-0.591775	down
PA(18:1_20:5)	GP	PA	1.19572	0.0338788	0.106332	-1.11108	down
PA(16:0_22:0)	GP	PA	1.49807	0.00168443	0.0238098	-0.954827	down
PA(20:0_18:1)	GP	PA	1.24134	0.0192966	0.077347	-0.697403	down
PC(15:0_22:6)	GP	PC	1.57534	0.000356	0.0114561	-1.21406	down
PC(16:1_20:3)	GP	PC	1.53545	0.00037	0.0114561	-1.07076	down
PC(16:1_19:2)	GP	PC	1.23499	0.0175205	0.073079	-1.0657	down
PC(15:1_20:1)	GP	PC	1.12949	0.0310225	0.099839	-0.623092	down
PC(17:0_20:5)	GP	PC	1.12702	0.028975	0.0974149	-0.706363	down
PC(16:0_18:2)	GP	PC	1.17269	0.0292453	0.0974149	-0.786637	down
PC(14:0_18:2)	GP	PC	1.3401	0.0117627	0.0560718	-0.668318	down
PC(17:0_18:2)	GP	PC	1.48375	0.00217096	0.0258162	-1.01438	down
PC(18:0_12:0)	GP	PC	1.15255	0.026679	0.0928076	-0.531719	down
PC(15:0_16:1)	GP	PC	1.2253	0.0280314	0.0958054	-0.876083	down
PC(15:1_18:2)	GP	PC	1.2521	0.0116269	0.0560718	-0.514114	down
PC(19:0_20:4)	GP	PC	1.4905	0.00134614	0.0205651	-1.04765	down
PC(18:0_20:4)	GP	PC	1.61588	0.000557	0.0149018	-1.13898	down
PC(20:3_18:1)	GP	PC	1.27405	0.0152215	0.067017	-0.607389	down
PC(20:4_17:0)	GP	PC	1.14011	0.0357059	0.109625	-0.630455	down
PC(16:0_20:4)	GP	PC	1.50241	0.0035216	0.0325804	-1.15734	down
PC(18:2_18:2)	GP	PC	1.5836	0.000208	0.00895776	-0.818004	down
PC(15:0_20:4)	GP	PC	1.4045	0.00400949	0.0343898	-1.20299	down
PC(14:0_20:4)	GP	PC	1.50438	0.00202564	0.0247833	-1.16541	down
PC(18:0_20:3)	GP	PC	1.37665	0.00634524	0.0445873	-0.631941	down
PC(19:1_18:2)	GP	PC	1.29873	0.0118958	0.0562832	-0.963693	down
PC(16:0_20:3)	GP	PC	1.23827	0.0230875	0.0861027	-0.647799	down
PC(18:1_18:2)	GP	PC	1.28312	0.0184951	0.0751659	-0.572805	down
PC(16:1_18:2)	GP	PC	1.26019	0.0171767	0.0723591	-0.660633	down
PC(16:1_18:3)	GP	PC	1.30589	0.0130025	0.0595206	-0.655057	down
PC(16:0_20:5)	GP	PC	1.37262	0.0073834	0.0475422	-0.929185	down
PC(18:2_18:3)	GP	PC	1.30384	0.0106694	0.0536857	-0.878005	down
PC(18:2_22:6)	GP	PC	1.57685	0.000726	0.0157487	-1.23929	down
PC(20:4_20:4)	GP	PC	1.49445	0.00401395	0.0343898	-2.46506	down
PC(20:1_22:6)	GP	PC	1.32419	0.00712011	0.0465376	-0.632907	down
PC(20:3_20:4)	GP	PC	1.44153	0.00699823	0.0464585	-2.08288	down
PC(18:1_22:6)	GP	PC	1.42183	0.00808486	0.0483566	-0.862043	down
PC(18:2_20:5)	GP	PC	1.60057	0.000351	0.0114561	-1.45542	down
PC(16:1_22:6)	GP	PC	1.45801	0.00530751	0.0410361	-1.03844	down
PC(20:2_20:4)	GP	PC	1.23541	0.0220255	0.083368	-0.620279	down
PC(18:1_22:5)	GP	PC	1.50082	0.0012134	0.0199818	-0.970945	down
PC(20:4_16:1)	GP	PC	1.45751	0.00523164	0.0410361	-1.11689	down
PC(18:0_22:6)	GP	PC	1.60953	0.000142	0.00691202	-1.23282	down
PC(18:2_20:4)	GP	PC	1.65265	0.000226	0.00895776	-1.39422	down
PC(16:0_22:6)	GP	PC	1.56799	0.00111757	0.0191497	-1.03266	down
PC(22:5_14:1)	GP	PC	1.11372	0.0441164	0.124766	-0.800605	down
PC(14:0_22:6)	GP	PC	1.60925	0.00012	0.00617313	-1.23224	down
PC(22:4_18:1)	GP	PC	1.0966	0.0492379	0.132838	-0.538302	down
PC(18:0_22:5)	GP	PC	1.4228	0.00544116	0.0417223	-0.830771	down
PC(20:1_20:4)	GP	PC	1.30588	0.0155121	0.0678255	-0.815815	down
PC(18:2_20:3)	GP	PC	1.66718	2.81e-05	0.00297129	-1.09772	down
PC(20:5_18:0)	GP	PC	1.52072	0.000893	0.0171642	-0.922028	down
PC(16:0_22:5)	GP	PC	1.391	0.00606172	0.0434252	-0.89431	down
PC(18:1_20:4)	GP	PC	1.5899	0.00145928	0.021769	-1.05497	down
PC(16:1_22:5)	GP	PC	1.41898	0.00600394	0.0434252	-1.15318	down
PC(13:0_16:1)	GP	PC	1.31674	0.012381	0.0579303	-0.727601	down
PC(13:0_16:0)	GP	PC	1.44049	0.00224378	0.0258162	-1.09054	down
PC(12:0_16:1)	GP	PC	1.44632	0.00454352	0.0371689	-0.853296	down
PC(14:0_15:0)	GP	PC	1.39487	0.00638277	0.0445873	-0.754205	down
PC(18:1_20:5)	GP	PC	1.60371	0.000619	0.0156929	-0.834943	down
PC(15:1_16:1)	GP	PC	1.55576	0.00243407	0.0270619	-0.965185	down
PC(15:1_17:1)	GP	PC	1.12379	0.0380788	0.114689	-0.819667	down
PC(17:0_15:1)	GP	PC	1.07916	0.0402653	0.118192	-0.653549	down
PC(18:1_24:1)	GP	PC	1.09806	0.0362633	0.110843	0.777269	up
PC(O-16:0_22:0)	GP	PC-O	1.15683	0.0276249	0.0951818	0.543882	up
PC(O-18:1_22:1)	GP	PC-O	1.34158	0.00707137	0.0464585	0.833586	up
PC(O-18:1_24:1)	GP	PC-O	1.31757	0.00706318	0.0464585	0.940412	up
PC(O-16:1_20:5)	GP	PC-O	1.15132	0.0427867	0.122596	-0.7052	down
PC(O-16:1_20:4)	GP	PC-O	1.16439	0.0393764	0.117205	-0.775347	down
PC(O-16:1_22:6)	GP	PC-O	1.14122	0.0453209	0.126301	-0.602179	down
PE(20:4_20:0)	GP	PE	1.27354	0.013062	0.0595779	-0.640682	down
PE(18:0_22:4)	GP	PE	1.19412	0.0263961	0.0924592	-0.788958	down
PE(16:0_22:4)	GP	PE	1.58198	0.000672	0.0157487	-1.33027	down
PE(18:1_20:3)	GP	PE	1.32091	0.00701464	0.0464585	-0.816993	down
PE(20:4_18:0)	GP	PE	1.16552	0.0252951	0.0903499	-0.583732	down
PE(16:1_20:4)	GP	PE	1.55504	0.00176681	0.0241026	-1.01261	down
PE(17:0_20:4)	GP	PE	1.09934	0.0443167	0.124766	-0.946265	down
PE(18:2_18:2)	GP	PE	1.1465	0.0428706	0.122596	-0.79948	down
PE(16:0_20:4)	GP	PE	1.56207	0.00071	0.0157487	-1.18827	down
PE(18:3_16:1)	GP	PE	1.30636	0.0140691	0.063016	-1.17255	down
PE(20:4_14:0)	GP	PE	1.50583	0.0034868	0.0325093	-1.13995	down
PE(18:0_24:3)	GP	PE	1.24829	0.0184296	0.0751659	-0.706848	down
PE(20:3_18:0)	GP	PE	1.1883	0.0197682	0.0778448	-0.679626	down
PE(16:0_20:5)	GP	PE	1.46869	0.00223215	0.0258162	-1.14526	down
PE(20:1_18:2)	GP	PE	1.10854	0.0255351	0.0909509	-0.563073	down
PE(17:0_20:3)	GP	PE	1.27891	0.0105365	0.0536668	-0.825475	down
PE(20:5_16:1)	GP	PE	1.40542	0.00760663	0.0479299	-1.03599	down
PE(20:5_18:1)	GP	PE	1.256	0.0235156	0.0871866	-0.611584	down
PE(22:6_16:0)	GP	PE	1.59579	0.000837	0.0170359	-1.66647	down
PE(22:6_18:0)	GP	PE	1.20364	0.0171579	0.0723591	-0.702444	down
PE(18:1_22:5)	GP	PE	1.42599	0.00370337	0.0333041	-0.879466	down
PE(16:1_22:6)	GP	PE	1.59017	0.000714	0.0157487	-1.22657	down
PE(17:1_22:6)	GP	PE	1.65924	5.22e-05	0.00456508	-1.19363	down
PE(22:6_18:1)	GP	PE	1.24191	0.0242038	0.0888316	-0.821545	down
PE(22:6_18:2)	GP	PE	1.12445	0.046965	0.1289	-0.915942	down
PE(18:0_22:5)	GP	PE	1.23968	0.0179648	0.0745562	-0.687266	down
PE(17:0_22:5)	GP	PE	1.42519	0.00605373	0.0434252	-0.665084	down
PE(18:1_20:4)	GP	PE	1.34718	0.0118249	0.0561573	-0.7583	down
PE(16:0_22:5)	GP	PE	1.68051	8.69e-06	0.0012399	-1.54207	down
PE(18:1_18:2)	GP	PE	1.33359	0.00997027	0.0518127	-0.731293	down
PE(20:1_20:5)	GP	PE	1.13131	0.0413025	0.120394	-0.681956	down
PE(20:2_20:4)	GP	PE	1.2469	0.0217035	0.0829282	-0.695973	down
PE(18:2_22:5)	GP	PE	1.22386	0.0256353	0.0910521	-0.962294	down
PE(20:2_20:5)	GP	PE	1.1373	0.0388849	0.116288	-0.704061	down
PE(20:4_20:4)	GP	PE	1.72506	6.03e-08	7.652e-05	-1.60676	down
PE(20:4_22:6)	GP	PE	1.1368	0.0300059	0.0979848	-0.88342	down
PE(16:0_14:0)	GP	PE	1.2784	0.0203509	0.079377	-0.995522	down
PE(16:0_20:3)	GP	PE	1.21381	0.0247335	0.089606	-0.718285	down
PE(15:0_18:2)	GP	PE	1.19444	0.0313166	0.100277	-0.69073	down
PE(16:0_16:0)	GP	PE	1.24803	0.0193913	0.077347	-0.896996	down
PE(18:1_17:2)	GP	PE	1.40932	0.00546206	0.0417223	-0.688939	down
PE(18:1_20:2)	GP	PE	1.09923	0.0403688	0.118192	-0.508345	down
PE(14:0_22:4)	GP	PE	1.14791	0.0261218	0.0920485	-0.67897	down
PE(15:0_22:4)	GP	PE	1.43088	0.00579585	0.0427275	-1.10972	down
PE(16:2_18:2)	GP	PE	1.19952	0.0295779	0.0974149	-0.968475	down
PE(18:1_16:1)	GP	PE	1.36685	0.00943456	0.0509407	-0.810798	down
PE(18:2_16:0)	GP	PE	1.34742	0.00779414	0.0479299	-1.09854	down
PE(17:1_18:1)	GP	PE	1.24938	0.0217131	0.0829282	-0.787039	down
PE(18:1_18:1)	GP	PE	1.34395	0.0115237	0.0560718	-0.711974	down
PE(18:0_18:2)	GP	PE	1.31555	0.00781668	0.0479299	-0.796347	down
PE(20:2_16:0)	GP	PE	1.51006	0.0023483	0.0265861	-1.04227	down
PE(19:0_18:2)	GP	PE	1.44064	0.00412345	0.0347077	-1.15866	down
PE(16:1_17:1)	GP	PE	1.37886	0.00948108	0.0509407	-1.00634	down
PE(20:2_18:0)	GP	PE	1.45754	0.00221821	0.0258162	-0.997131	down
PE(18:3_16:0)	GP	PE	1.39929	0.00802699	0.0483566	-1.4072	down
PE(16:1_18:2)	GP	PE	1.4943	0.00254647	0.0275764	-1.02473	down
PE(20:0_18:2)	GP	PE	1.3472	0.00477132	0.0385084	-0.813914	down
PE(16:1_16:1)	GP	PE	1.44031	0.00617371	0.043979	-1.0046	down
PE(20:1_18:1)	GP	PE	1.17028	0.0252496	0.0903499	-0.54582	down
PE(16:1_14:0)	GP	PE	1.51912	0.00318777	0.0306605	-1.11849	down
PE(18:2_14:0)	GP	PE	1.42132	0.00594207	0.0433019	-1.34197	down
PE(18:0_18:0)	GP	PE	1.17315	0.029	0.0974149	-0.448445	down
PE(16:1_16:0)	GP	PE	1.51396	0.0018943	0.0247833	-1.15286	down
PE(14:0_18:1)	GP	PE	1.31188	0.0148733	0.0657121	-0.89596	down
PE(16:0_18:1)	GP	PE	1.37285	0.00561742	0.0423981	-0.946636	down
PE(16:1_18:0)	GP	PE	1.32198	0.00909589	0.050146	-0.717141	down
PE(18:1_18:0)	GP	PE	1.35944	0.0069674	0.0464585	-0.721377	down
PE(20:1_18:0)	GP	PE	1.31499	0.00996215	0.0518127	-0.615711	down
PE(20:0_18:1)	GP	PE	1.31331	0.0073863	0.0475422	-0.834309	down
PE(20:1_16:0)	GP	PE	1.42993	0.00271244	0.0280858	-0.799998	down
PE(O-24:2_18:1)	GP	PE-O	1.57316	0.00161078	0.0237497	-2.12466	down
PE(O-22:1_18:2)	GP	PE-O	1.35031	0.00729442	0.0474324	-0.815535	down
PE(O-20:0_20:3)	GP	PE-O	1.42508	0.00273138	0.0280858	-0.803159	down
PE(O-20:1_18:2)	GP	PE-O	1.39827	0.0025829	0.0275764	-1.26786	down
PE(O-16:0_20:4)	GP	PE-O	1.55401	0.000718	0.0157487	-0.826679	down
PE(O-20:0_20:4)	GP	PE-O	1.44486	0.00128763	0.0204794	-1.31225	down
PE(O-16:0_22:4)	GP	PE-O	1.58911	0.000505	0.0139192	-0.846298	down
PE(O-18:0_20:4)	GP	PE-O	1.34066	0.00574764	0.0426949	-0.607861	down
PE(O-22:1_20:3)	GP	PE-O	1.39661	0.00830519	0.0487737	-0.948338	down
PE(O-15:1_20:4)	GP	PE-O	1.47333	0.00413554	0.0347077	-1.19814	down
PE(O-16:0_20:5)	GP	PE-O	1.55377	0.00104651	0.0184301	-1.0072	down
PE(O-16:1_20:4)	GP	PE-O	1.39453	0.00904757	0.0500975	-0.998562	down
PE(O-16:1_20:3)	GP	PE-O	1.13873	0.0443767	0.124766	-0.535308	down
PE(O-20:0_18:1)	GP	PE-O	1.42506	0.00396404	0.0343898	-0.751173	down
PE(O-17:2_18:1)	GP	PE-O	1.44358	0.00566784	0.0425256	-0.726263	down
PE(O-16:0_16:0)	GP	PE-O	1.3749	0.0109558	0.0546929	-0.875296	down
PE(O-18:0_16:0)	GP	PE-O	1.37091	0.00862948	0.0488134	-0.652568	down
PE(O-20:0_16:0)	GP	PE-O	1.67519	5.13e-05	0.00456508	-1.06167	down
PE(O-16:0_20:0)	GP	PE-O	1.20095	0.029534	0.0974149	-0.417737	down
PE(O-16:1_16:0)	GP	PE-O	1.23434	0.0249313	0.0900154	-1.18599	down
PE(O-16:0_18:1)	GP	PE-O	1.57728	0.00141641	0.021381	-0.827968	down
PE(O-18:0_18:1)	GP	PE-O	1.31789	0.00785556	0.0479299	-0.505638	down
PE(O-16:1_16:1)	GP	PE-O	1.434	0.00756107	0.0479299	-0.86173	down
PE(O-16:0_18:2)	GP	PE-O	1.50459	0.00335946	0.0317895	-0.763165	down
PE(O-16:1_21:1)	GP	PE-O	1.18313	0.0323141	0.102436	-0.722002	down
PE(O-16:1_22:1)	GP	PE-O	1.15774	0.0395992	0.117317	-0.460329	down
PE(O-20:1_18:1)	GP	PE-O	1.43651	0.00585499	0.0429141	-0.921305	down
PE(O-20:1_20:1)	GP	PE-O	1.44345	0.00300685	0.0297866	-0.665106	down
PE(O-22:1_18:1)	GP	PE-O	1.40746	0.00868177	0.0488134	-0.97559	down
PE(O-16:2_16:1)	GP	PE-O	1.35672	0.0119869	0.0563747	-0.954569	down
PE(O-17:1_18:2)	GP	PE-O	1.26487	0.0186637	0.0754954	-0.771249	down
PE(O-17:1_20:4)	GP	PE-O	1.17523	0.0345172	0.107803	-0.630128	down
PE(O-14:1_22:6)	GP	PE-O	1.47396	0.00195987	0.0247833	-1.04685	down
PE(O-20:1_22:5)	GP	PE-O	1.3332	0.0131532	0.0597789	-1.02872	down
PE(O-20:0_22:6)	GP	PE-O	1.55033	0.00201999	0.0247833	-1.20078	down
PE(O-18:1_24:5)	GP	PE-O	1.16083	0.0395229	0.117317	-0.602785	down
PE(O-16:2_20:5)	GP	PE-O	1.30404	0.014114	0.063016	-0.796377	down
PE(O-15:1_22:6)	GP	PE-O	1.28992	0.0165118	0.0709726	-1.1766	down
PE(O-18:3_20:4)	GP	PE-O	1.20276	0.0301389	0.0979902	-0.802726	down
PE(O-18:0_20:5)	GP	PE-O	1.35444	0.00390484	0.0343898	-0.589191	down
PE(O-18:1_22:6)	GP	PE-O	1.18257	0.0320451	0.101837	-0.584512	down
PE(O-18:0_22:6)	GP	PE-O	1.40281	0.00411503	0.0347077	-0.579952	down
PE(O-20:1_22:6)	GP	PE-O	1.40594	0.00755449	0.0479299	-1.09584	down
PE(O-16:2_22:6)	GP	PE-O	1.53401	0.00292661	0.0296306	-1.03932	down
PE(O-18:3_20:5)	GP	PE-O	1.14327	0.039371	0.117205	-0.986334	down
PE(O-17:2_22:6)	GP	PE-O	1.13439	0.0414923	0.12067	-0.992842	down
PE(O-18:3_22:5)	GP	PE-O	1.10466	0.0491465	0.132838	-0.708238	down
PE(O-20:2_22:6)	GP	PE-O	1.18935	0.0305835	0.0990306	-0.717666	down
PE(O-16:1_22:5)	GP	PE-O	1.21392	0.02926	0.0974149	-0.680186	down
PE(O-17:1_22:5)	GP	PE-O	1.11822	0.045063	0.125859	-0.640126	down
PE(O-20:1_20:4)	GP	PE-O	1.34494	0.0133534	0.0604717	-1.02638	down
PE(O-16:1_24:4)	GP	PE-O	1.39891	0.00870017	0.0488134	-0.875048	down
PE(O-20:0_22:5)	GP	PE-O	1.44711	0.0011467	0.0191885	-1.40706	down
PE(O-22:1_20:4)	GP	PE-O	1.31824	0.0164931	0.0709726	-0.969856	down
PE(O-20:1_22:4)	GP	PE-O	1.37711	0.00641014	0.0445873	-1.05118	down
PE(O-18:1_24:4)	GP	PE-O	1.16806	0.0362774	0.110843	-0.572011	down
PE(O-16:2_20:4)	GP	PE-O	1.4176	0.0085755	0.0488134	-0.97569	down
PE(O-16:1_20:5)	GP	PE-O	1.18714	0.0353385	0.109025	-0.880312	down
PE(O-16:0_22:6)	GP	PE-O	1.55417	0.00086	0.0170359	-1.10924	down
PE(O-18:2_20:4)	GP	PE-O	1.31874	0.0142674	0.0634773	-0.806795	down
PE(O-17:2_20:4)	GP	PE-O	1.23001	0.0242395	0.0888316	-0.85339	down
PE(O-18:1_20:5)	GP	PE-O	1.41283	0.00780334	0.0479299	-0.828999	down
PE(O-15:1_22:5)	GP	PE-O	1.29563	0.0128761	0.0593706	-0.933194	down
PE(P-18:1_18:2)	GP	PE-P	1.4569	0.00225994	0.0258162	-0.748356	down
PE(P-18:0_16:0)	GP	PE-P	1.22898	0.0194587	0.077347	-0.437803	down
PE(P-17:0_20:3)	GP	PE-P	1.29675	0.00705742	0.0464585	-0.610813	down
PE(P-18:0_22:2)	GP	PE-P	1.12642	0.0326903	0.10337	0.549174	up
PE(P-16:0_16:1)	GP	PE-P	1.40572	0.00247569	0.0270619	-0.615929	down
PE(P-16:0_18:1)	GP	PE-P	1.10912	0.0421747	0.12192	-0.448737	down
PE(P-18:0_22:1)	GP	PE-P	1.15184	0.0290452	0.0974149	0.363176	up
PE(P-18:1_20:4)	GP	PE-P	1.34038	0.0105491	0.0536668	-0.593996	down
PE(P-18:0_22:5)	GP	PE-P	1.09532	0.0287563	0.0974149	-0.440871	down
PE(P-14:0_22:6)	GP	PE-P	1.17434	0.0267151	0.0928076	-0.581126	down
PE(P-18:1_24:2)	GP	PE-P	1.18259	0.0245405	0.089606	0.485944	up
PE(P-18:1_14:0)	GP	PE-P	1.12252	0.0315565	0.100537	-0.632558	down
PE(P-16:0_16:0)	GP	PE-P	1.11042	0.0447402	0.12551	-0.976564	down
PG(18:2_16:1)	GP	PG	1.23216	0.0137949	0.0622489	-0.548765	down
PG(16:0_16:1)	GP	PG	1.36575	0.00425703	0.0352805	-0.514798	down
PG(18:1_14:0)	GP	PG	1.51476	0.00069	0.0157487	-0.825128	down
PG(16:0_20:4)	GP	PG	1.17463	0.0262062	0.0920485	-1.20126	down
PG(16:1_16:1)	GP	PG	1.46572	0.00184314	0.0247833	-0.741803	down
PG(18:0_20:4)	GP	PG	1.1007	0.0448838	0.125635	-1.0809	down
PG(20:1_18:1)	GP	PG	1.28782	0.010924	0.0546929	-0.701742	down
PG(19:0_20:4)	GP	PG	1.34707	0.00769155	0.0479299	-1.05168	down
PG(9:0_22:4)	GP	PG	1.47303	0.00126207	0.0204794	-0.522631	down
PG(22:0_20:3)	GP	PG	1.23828	0.00956479	0.0509587	-0.618631	down
PG(18:0_16:3)	GP	PG	1.23257	0.0275312	0.0951214	-0.827229	down
PG(20:0_20:4)	GP	PG	1.39737	0.00267255	0.0280858	-1.01544	down
PG(22:6_22:6)	GP	PG	1.20141	0.018477	0.0751659	-0.716695	down
PG(20:4_22:6)	GP	PG	1.08021	0.0485794	0.132186	-0.754601	down
PG(20:1_22:6)	GP	PG	1.22772	0.0227683	0.0856682	-0.95274	down
PG(22:0_22:6)	GP	PG	1.27567	0.0128737	0.0593706	-0.7013	down
PG(19:0_22:6)	GP	PG	1.07131	0.0431213	0.122596	-0.787342	down
PG(16:1_20:5)	GP	PG	1.36558	0.00832775	0.0487737	-0.867294	down
PG(22:0_20:5)	GP	PG	1.46545	0.00176778	0.0241026	-0.911016	down
PG(21:1_20:4)	GP	PG	1.32494	0.0116785	0.0560718	-1.17468	down
PG(22:0_20:4)	GP	PG	1.43288	0.0020327	0.0247833	-0.892654	down
PG(18:0_24:2)	GP	PG	1.0669	0.0366182	0.111615	-0.5789	down
PG(15:0_22:0)	GP	PG	1.13698	0.027812	0.0953126	-0.675345	down
PG(17:0_18:0)	GP	PG	1.60935	9.58e-05	0.00576796	-1.43507	down
PG(14:0_16:0)	GP	PG	1.26803	0.00821128	0.0487737	-0.67202	down
PG(16:0_22:6)	GP	PG	1.17297	0.0262031	0.0920485	-0.675159	down
PG(16:0_22:2)	GP	PG	1.16564	0.0229893	0.0859894	-0.803096	down
PG(18:0_16:1)	GP	PG	1.16821	0.0299625	0.0979848	-0.59158	down
PG(19:0_15:1)	GP	PG	1.22948	0.0245978	0.089606	-0.46544	down
PG(18:0_22:1)	GP	PG	1.14128	0.0198457	0.0779079	-0.645295	down
PI(19:0_17:2)	GP	PI	1.55354	0.0011501	0.0191885	-0.647301	down
PI(16:0_22:4)	GP	PI	1.55027	0.000336	0.0114561	-1.01266	down
PI(15:0_19:2)	GP	PI	1.62058	5.76e-05	0.00456747	-1.02733	down
PI(15:0_19:1)	GP	PI	1.67825	5.92e-06	0.0012399	-0.937273	down
PI(16:0_19:0)	GP	PI	1.24378	0.0232017	0.0862748	-0.878775	down
PI(18:0_19:0)	GP	PI	1.56784	0.000465	0.0131001	-1.26159	down
PI(19:0_15:1)	GP	PI	1.53447	0.00039	0.0115568	-0.934435	down
PI(19:0_16:1)	GP	PI	1.38573	0.00923086	0.0506698	-0.97298	down
PI(19:0_18:1)	GP	PI	1.13535	0.0404538	0.118192	-0.745641	down
PI(18:1_22:5)	GP	PI	1.39269	0.00979312	0.0515703	-1.20386	down
PI(18:1_20:5)	GP	PI	1.18407	0.0291497	0.0974149	-0.968672	down
PI(18:0_22:5)	GP	PI	1.19973	0.0247327	0.089606	-0.567119	down
PI(20:4_20:1)	GP	PI	1.24849	0.0180936	0.0746731	-0.633389	down
PI(18:1_22:4)	GP	PI	1.35828	0.00850498	0.0488134	-1.03773	down
PI(18:1_22:6)	GP	PI	1.55218	0.00190996	0.0247833	-1.13659	down
PI(20:4_16:1)	GP	PI	1.46314	0.00322454	0.0307422	-1.18526	down
PI(16:0_20:4)	GP	PI	1.27982	0.0179923	0.0745562	-1.14502	down
PI(17:0_20.4)	GP	PI	1.12966	0.0455245	0.126331	-0.93823	down
PI(16:0_18:0)	GP	PI	1.65639	8.8e-06	0.0012399	-1.10154	down
PI(16:0_16:1)	GP	PI	1.68824	3.44e-06	0.0010905	-1.3235	down
PI(16:0_18:1)	GP	PI	1.65834	7.47e-05	0.00526083	-0.960956	down
PI(18:2_16:0)	GP	PI	1.25068	0.0174513	0.0730304	-0.823951	down
PI(16:1_18:1)	GP	PI	1.66606	1.13e-05	0.0014301	-1.05244	down
PI(17:1_18:1)	GP	PI	1.37132	0.00785929	0.0479299	-1.06	down
PI(18:1_18:1)	GP	PI	1.49425	0.000733	0.0157487	-0.577767	down
PI(18:1_20:1)	GP	PI	1.39674	0.00247245	0.0270619	-0.237471	down
PS(16:0_22:6)	GP	PS	1.70411	2.69e-06	0.0010905	-1.69795	down
PS(18:0_20:5)	GP	PS	1.21483	0.0164543	0.0709726	-0.743073	down
PS(16:0_20:3)	GP	PS	1.44635	0.00246935	0.0270619	-1.19966	down
PS(16:0_18:1)	GP	PS	1.34022	0.00623916	0.044197	-0.743602	down
PS(16:0_16:1)	GP	PS	1.43338	0.00168997	0.0238098	-1.0013	down
PS(16:0_16:0)	GP	PS	1.35662	0.00319179	0.0306605	-0.86218	down
PS(18:2_16:0)	GP	PS	1.25746	0.0106074	0.0536668	-0.698273	down
SM(d18:1/25:1)	SP	SM	1.27429	0.00945667	0.0509407	0.456978	up
SM(d18:2/14:0)	SP	SM	1.35277	0.00984228	0.0515703	-0.574279	down
SM(d18:1/25:0)	SP	SM	1.22885	0.0181383	0.0746731	0.645267	up
SM(d18:1/26:1)	SP	SM	1.14849	0.025856	0.0915795	0.382501	up
SM(d18:0/18:0)	SP	SM	1.2516	0.0215428	0.0827765	-0.499931	down
SM(d18:0/16:0)	SP	SM	1.45563	0.00367676	0.033301	-1.1257	down
SM(d18:0/14:0)	SP	SM	1.55651	0.000777	0.0161453	-1.36672	down
SM(d18:0/13:0)	SP	SM	1.41089	0.00484718	0.0386555	-0.875086	down
SM(d18:0/12:0)	SP	SM	1.56839	0.00096	0.0176489	-1.01129	down
SM(d18:1/14:0)	SP	SM	1.10241	0.0469312	0.1289	-0.371045	down
SM(d18:2/22:1)	SP	SM	1.1295	0.026528	0.0926654	-0.384405	down
SM(d18:1/12:0)	SP	SM	1.46538	0.00339301	0.0318692	-0.79479	down
SPH(d17:1)	SP	SPH	1.2367	0.0194448	0.077347	-0.995337	down
SPH(d18:0)	SP	SPH	1.59197	0.000707	0.0157487	-1.67734	down
SPH(d18:2)	SP	SPH	1.33851	0.00899329	0.0500153	-1.10429	down
TG(18:0_17:1_18:1)	GL	TG	1.1572	0.0381873	0.114743	-1.07565	down
TG(18:1_20:2_18:3)	GL	TG	1.2872	0.0195663	0.0775	-1.43004	down
TG(14:0_20:2_22:6)	GL	TG	1.34079	0.0115872	0.0560718	-1.56184	down
TG(16:0_20:2_22:6)	GL	TG	1.31499	0.0143262	0.0635162	-1.51629	down
TG(14:1_16:1_18:1)	GL	TG	1.11265	0.0483115	0.13174	-1.57819	down
TG(14:0_16:0_20:4)	GL	TG	1.32467	0.00861808	0.0488134	-1.51174	down
TG(16:0_16:0_20:4)	GL	TG	1.12653	0.0462326	0.127719	-1.30963	down
TG(15:0_16:1_18:1)	GL	TG	1.14447	0.0404241	0.118192	-1.06811	down
TG(17:0_18:1_18:1)	GL	TG	1.34584	0.0116055	0.0560718	-1.46313	down
TG(16:0_18:0_20:4)	GL	TG	1.15737	0.0312577	0.100277	-0.91868	down
TG(16:0_17:0_18:1)	GL	TG	1.22554	0.0299036	0.0979848	-1.31556	down
TG(15:0_18:0_20:0)	GL	TG	1.44572	0.00502646	0.0398347	-1.12832	down
TG(16:0_17:0_18:0)	GL	TG	1.56683	0.00133185	0.0205651	-1.24457	down
TG(15:0_16:0_18:0)	GL	TG	1.39513	0.00479836	0.0385084	-1.10404	down
TG(16:0_16:0_17:0)	GL	TG	1.23059	0.0269005	0.0931963	-1.34575	down
TG(16:0_18:0_22:0)	GL	TG	1.19018	0.0314871	0.100537	-0.981613	down
TG(18:1_18:1_22:6)	GL	TG	1.32404	0.00935603	0.0509161	-1.135	down
TG(16:0_18:2_18:3)	GL	TG	1.23258	0.0249885	0.0900154	-0.796878	down
TG(16:0_16:1_20:4)	GL	TG	1.35767	0.00952936	0.0509587	-1.37164	down
TG(16:0_18:2_20:4)	GL	TG	1.10219	0.0481252	0.131514	-1.4385	down
TG(18:0_18:2_22:6)	GL	TG	1.18079	0.0337848	0.106302	-1.56528	down
TG(16:0_16:1_22:5)	GL	TG	1.23124	0.03006	0.0979848	-1.20344	down
TG(16:0_18:1_22:5)	GL	TG	1.25917	0.0228658	0.0857804	-1.80595	down
TG(16:0_16:1_22:6)	GL	TG	1.46698	0.00354581	0.0325804	-1.52628	down
TG(16:0_18:1_22:6)	GL	TG	1.29309	0.0170735	0.0723591	-1.42237	down
TG(16:1_16:1_24:5)	GL	TG	1.17466	0.0306151	0.0990306	-1.65156	down
TG(18:1_18:1_22:5)	GL	TG	1.09534	0.0496065	0.133265	-1.59616	down
TG(16:1_16:1_22:6)	GL	TG	1.29474	0.0186952	0.0754954	-2.35385	down
TG(16:0_18:2_22:6)	GL	TG	1.29967	0.0199071	0.0779079	-1.50228	down
TG(16:0_16:0_22:6)	GL	TG	1.41366	0.0088819	0.0496134	-1.53808	down
Variable Importance in Projection[VIP] Fatty Acyls [FA] Glycerolipids [GL] Glycerophospholipids [GP] Sphingolipids [SP] Sterol Lipids [ST] Prenol Lipids [PR] Saccharolipids [SL] Polyketides [PK]
